## **MMR vaccination induces a trained immunity program characterized by functional and metabolic reprogramming of $\gamma\delta$ T cells**

Rutger J. Röring<sup>1,2†</sup>, Priya A. Debisarun<sup>1,2†</sup>, Javier Botey-Bataller<sup>1,2,3,4†</sup>, Tsz Kin Suen<sup>5</sup>, Özlem Bulut<sup>1,2</sup>, Gizem Kilic<sup>1,2</sup>, Valerie A. C. M. Koeken<sup>1,2,3,4</sup>, Andrei Sarlea<sup>1</sup>, Harsh Bahrar<sup>1,2</sup>, Helga Dijkstra<sup>1,2</sup>, Heidi  
5 Lemmers<sup>1,2</sup>, Katharina L. Gössling<sup>6</sup>, Nadine Röchel<sup>6</sup>, Philipp N. Ostermann<sup>7</sup>, Lisa Müller<sup>7</sup>, Heiner Schaal<sup>7</sup>, Ortwin Adams<sup>7</sup>, Arndt Borkhardt<sup>6</sup>, Yavuz Ariyurek<sup>8</sup>, Emile J. de Meijer<sup>8</sup>, Susan Kloet<sup>8</sup>, Jaap ten Oever<sup>1,2</sup>, Katarzyna Placek<sup>4</sup>, Yang Li<sup>1,2,3,4</sup>, Mihai G. Netea<sup>1,2,5\*</sup>

<sup>1</sup>Department of Internal Medicine and Radboud Center for Infectious Diseases, Radboud university  
10 medical center, Nijmegen, The Netherlands

<sup>2</sup>Radboud Institute for Molecular Life Sciences, Radboud university medical center, Nijmegen, The Netherlands

<sup>3</sup>Department of Computational Biology for Individualised Medicine, Centre for Individualised Infection Medicine (CiiM), a joint venture between the Helmholtz-Centre for Infection Research (HZI)  
15 and Hannover Medical School (MHH), Hannover, Germany

<sup>4</sup>TWINCORE, a joint venture between the Helmholtz-Centre for Infection Research (HZI) and Hannover Medical School (MHH), Hannover, Germany

<sup>5</sup>Department of Immunology and Metabolism, Life and Medical Sciences (LIMES) Institute, University of Bonn, Bonn, Germany

<sup>6</sup>Department for Pediatric Oncology, Hematology and Clinical Immunology, University Hospital  
20 Duesseldorf, Medical Faculty, Heinrich Heine University Duesseldorf, Dusseldorf

<sup>7</sup>Institute of Virology, University Hospital Duesseldorf, Medical Faculty, Heinrich Heine University Duesseldorf, Dusseldorf, Germany

<sup>8</sup>Leiden Genome Technology Center, Department of Human Genetics, Leiden University Medical  
25 Center, Leiden, the Netherlands

† These authors contributed equally to this work.

\*Corresponding author:

30 Mihai G. Netea, MD, PhD

Department of Internal Medicine, Radboud University Nijmegen Medical Center

Tel: +31-24-3618819

E-mail: [mihai.netea@radboudumc.nl](mailto:mihai.netea@radboudumc.nl)

35 **Abstract**

The measles, mumps and rubella (MMR) vaccine protects against all-cause mortality in children, but the immunological mechanisms mediating these effects are poorly known. We systematically investigated whether MMR can induce long-term functional changes in innate immune cells, a process termed trained immunity, that could at least partially mediate this heterologous protection. In a randomized placebo-controlled trial, 39 healthy adults received either the MMR vaccine or a placebo. By using single-cell RNA-sequencing, we found that MMR caused transcriptomic changes in CD14-positive monocytes and NK cells, but most profoundly in  $\gamma\delta$  T cells. Surprisingly, monocyte function was not altered by MMR vaccination. In contrast, the function of  $\gamma\delta$  T cells was significantly enhanced by MMR vaccination, with higher production of TNF and IFN $\gamma$ , as well as upregulation of cellular metabolic pathways. In conclusion, we describe a new trained immunity program characterized by modulation of  $\gamma\delta$  T cell function induced by MMR vaccination.

40

45

50

**One-sentence summary: 125 characters including spaces**

MMR vaccination induces cellular and metabolic reprogramming in  $\gamma\delta$  T cells towards a more active phenotype.

55

## INTRODUCTION

60 Vaccines are developed to target specific pathogens. However, an accumulating body of evidence suggests that certain live-attenuated vaccines provide a broad spectrum of protection against heterologous infections as well (non-specific beneficial effects; NSEs)(1, 2). Vaccine-induced NSEs are accompanied by epigenetic and metabolic changes in innate immune cells, also known as trained immunity (3-6). Recent studies suggest that induction of trained immunity is an attractive strategy to  
65 boost broad protection against infections and as anti-cancer therapy (7). Most of the studies aiming to study trained immunity induced by vaccines in humans have used the tuberculosis vaccine Bacille Calmette-Guérin (BCG) (8-10), while very little is known about the effects of other vaccines on innate immune cells. Although there is ample epidemiological evidence that other live attenuated vaccines also have NSEs (2), their potential effects on innate immune cells have not been studied.

70

Measles containing vaccines (MCVs) are one such group of vaccines associated with beneficial heterologous effects (11). Measles vaccines are routinely used in childhood immunization programs worldwide and were recently re-confirmed to be safe and effective (12). MMR vaccine is composed of a live-attenuated negative stranded measles virus, combined with mumps and rubella, and provides  
75 life-long immunity against measles after two doses. Several studies have confirmed higher child survival and lower morbidity after measles immunization, independent of measles-attributable disease (13, 14). This suggests that MMR induces trained immunity that can provide broad heterologous protection (15, 16). Here, we assess the potential of MMR vaccination to induce trained immunity against SARS-CoV-2 and a range of other microbial stimuli. We used single-cell multi-omics approaches  
80 to compare cellular heterogeneity in a randomized placebo-controlled trial of MMR re-vaccination in Dutch adults. Surprisingly, we found that MMR vaccination caused transcriptomic and functional changes in  $\gamma\delta$  T cells, rather than monocytes. This suggests that  $\gamma\delta$  T cells might have a key role in the mechanisms underlying MMR-induced trained immunity.

## 85 RESULTS

### Study design and baseline characteristics

To investigate the potential non-specific effects of MMR re-vaccination in adults, we conducted an exploratory randomized controlled trial (**Fig. 1A**; see methods for more details). Briefly, thirty-nine healthy adults (19 female and 20 male) were randomly assigned to receive either the MMR vaccine or  
90 a placebo. All participants were between 18 and 50 years of age and there were no significant differences in sex, age, or BMI between the vaccination arms (**Fig. S1**; **Table S1**). Peripheral venous blood was collected to conduct immunological analyses was collected immediately before vaccination and one month later. No infections occurred between visits or at least two weeks prior to the baseline measurement.

95

### Circulating biomarkers of inflammation after MMR vaccination

Previous studies have shown that trained immunity induced by BCG increases the responsiveness of innate immune cells upon rechallenge, but reduces systemic inflammation during homeostasis(8). We sought to investigate if this is also the case after MMR vaccination. To that end, we used Proximity  
100 Extension Assay technology (Olink) to assess targeted proteomics biomarkers (which have previously been related to inflammation, oncology, neurology, or cardiometabolic function) before and after MMR vaccination (**Fig. 1B**). There were no major changes in plasma proteome composition between the baseline measurement and 1 month after vaccination. Of all analyzed parameters (1289 after quality control), only 4 met our selected cutoffs for log<sub>2</sub> fold change > 0.5 and unadjusted p-value <  
105 0.05. These were PPY (a pancreatic protein associated with counter-regulation of gastric emptying(17)), S100A12 (a calcium-binding alarmin protein(18)), TMPRSS15 (a peptidase known to activate trypsin(19)), and CALCA (a vasodilating peptide hormone involved in calcium regulation and thought to also function as a neurotransmitter(20)).

We subsequently assessed the proteins that met the statistical significance threshold, independently  
110 of the fold change (**Fig. 1C-F**). Of the protein subcategories, the inflammation-related proteins showed the highest number of changes, with a trend towards upregulation after vaccination (**Fig. 1C**).

PNLIPRP2, the top significant hit from this sub-panel, is a pancreas-associated protein involved in lipid metabolism. Among the other enriched proteins were factors related to NK cell and T cell activities (IL-12B, IL-15, IFN $\gamma$ , CCL20, GZMA). Of the cardiometabolic-related proteins (**Fig. 1D**), most suggestive hits were also related to immunological processes either directly (GP2, CST6, NCAM1, MARCO) or indirectly (GH1). The proteins significantly changes in the oncology panel (Fig. 1E) were similarly enriched for immunologically relevant proteins (S100A12, PQBP1, CCL8, FCGR2B), with a trend towards upregulation after vaccination. Finally, in the neurology panel (**Fig. 1F**) there was also an upregulation of immunology-related proteins such as CCL2, VSTM1, and PLA2G10. These results indicate that inflammation-related proteins tend to be upregulated in the circulation after MMR vaccination, although the effect size is relatively limited. However, in terms of the effects of MMR vaccination on the systemic inflammatory status, this differs significantly from the inhibitory effects exerted by BCG vaccination.

We then considered the effects of MMR vaccination on circulating leukocyte counts (**Fig. 1G**). MMR vaccination, but not placebo treatment, significantly increased ( $p = 0.04$ ) the number of circulating leukocytes after one month, although there was a large inter-individual variation. This change appeared to be driven mainly by an increase in myeloid cells (neutrophils and monocytes), although the comparison did not reach statistical significance for the individual cell types. Together, our results show that MMR-vaccinated individuals present with slightly increased systemic inflammation one month after vaccination.

### **Transcriptome effects in monocytes and $\gamma\delta$ T cells after MMR vaccination**

We decided to further investigate the effects of MMR vaccination on the composition and cellular states of circulating leukocytes. To that end, we performed single-cell (sc)ATAC-seq and scRNA-seq on peripheral blood mononuclear cells (PBMCs) of a subset of participants. For scATAC-seq, we selected 12 participants from both the placebo and MMR-treated groups. We then selected half of those

individuals to also perform scRNA-seq, taking care to balance male and female participants from both the MMR and placebo groups.

An integrated analysis of both scRNA-seq and scATAC-seq data (**Fig. 2A, Fig. S2A-B**) based on marker genes enabled us to identify 13 cell types within the PBMC fraction (**Fig. S2C**). Since the white blood cell differential (**Fig. 1G**) suggested there might be changes in the PBMC composition, we leveraged the single-cell datasets to investigate this in more detail. Indeed, we observed intra-individual shifts in PBMC composition between timepoints (**Fig. , Fig. S3A**). However, we did not observe any consistent changes in either the MMR or placebo group (**Fig. 2B, S3A-B**). Although the low number of participants hindered statistical comparisons, our data suggest that it is unlikely that MMR vaccination has a major influence on PBMC composition one month after vaccination.

Previous studies have shown that vaccination with other live-attenuated vaccines such as BCG induces transcriptional and functional changes (trained immunity) in innate immune cells such as monocytes (21, 22). We therefore hypothesized that although the PBMC composition was not altered by MMR vaccination, changes in monocyte transcriptional and functional programs could account for its known NSEs, and possibly also for our observation that MMR increases systemic inflammation. We thus assessed the transcriptional effects of MMR and placebo between timepoints, across different cell types. In every cell type except CD4<sup>+</sup> T cells, MMR vaccination had a more pronounced transcriptional effect than placebo administration (**Fig. 2C**; top panel). Indeed, CD14<sup>+</sup> monocytes and NK cells, classical executors of BCG-induced trained immunity, were prominently influenced by MMR. Surprisingly however,  $\gamma\delta$  T cells were the most strongly affected cells at transcriptional level among all assessed cell types. Cell-type specific analysis of differentially accessible genes revealed the chromatin to be impacted by MMR vaccination only in CD14<sup>+</sup> monocytes (**Fig. 2C**; bottom panel).

### **MMR has minor effects on the transcriptome and epigenome of monocyte subpopulations**

Exploring further the monocyte sequencing data, we found different subpopulations defined by their transcriptional or open-chromatin signatures. Among them, we found a subpopulation highly expressing HLA genes and another one upregulating alarmins, in both data layers (**Fig. 3A**). We did not

identify significant changes in the subpopulations in either data layer (**Fig. S3A**). Investigating the transcriptional changes induced by MMR, we identified more than 20 differentially expressed genes (adjusted p-value < 0.05) and 7 genes with changed chromatin accessibility (**Fig. S4C**). Upregulated genes were enriched in pathways associated with response to mechanical stimulation or exposure to metals such as calcium (*FOS*, *FOSB*, *JUN*, *JUNB* and *NFKBIA*). Downregulated genes were enriched in cell-cell adhesion programs (*B2M*, *FGL2*, *CD46*, *PRKAR1A*) (**Fig. 3B,C**). Thus, while monocytes were moderately affected at the transcriptional level by MMR vaccination, these cells were not explicitly more pro-inflammatory during homeostasis.

### **Cytokine production capacity of PBMCs after MMR vaccination**

Innate immune memory is defined as the long-term functional reprogramming of innate immune cells by a first stimulation, leading to an altered response towards re-stimulation. To investigate functional immune responses after MMR vaccination or placebo, we stimulated PBMCs for 24 hours with a variety of bacterial (LPS, heat-killed *Staphylococcus aureus*), fungal (heat-killed *Candida albicans*), and viral (poly(I:C), R848, Influenza A (H1N1), SARS-CoV-2) stimuli, and measured monocyte-associated cytokine responses by ELISA. We measured TNF, IL-6, and IL-1RA for all stimuli. Additionally, we measured IP10 and IFN $\alpha$  specifically for the viral stimulations. We calculated log<sub>2</sub>-transformed fold changes corrected for age, sex, and BMI between one month after vaccination and baseline measurements, and statistically compared placebo treatment to MMR vaccination (**Fig. 3B-H**). We observed large intra- and inter-individual variations in cytokine responses between baseline and one month after treatment. However, there were no significant differences between placebo and MMR for any measured cytokine across all stimuli. Thus, we found no differences in PBMC cytokine production capacity after MMR vaccination. As monocytes are the main producers of the measured cytokines in PBMCs during 24-hour stimulations, this suggests that monocyte cytokine secretion capacity is not changed by MMR vaccination.

### **Transcriptional and functional reprogramming of V $\delta$ 2 T cells after MMR vaccination**

Because the most prominent changes in response to MMR were seen in  $\gamma\delta$  T cells according to the  
190 scRNA-seq data (**Fig.2**), in the next set of experiments we assessed whether vaccination changed the  
transcriptional and functional programs of these cells. A closer look into the  $\gamma\delta$  T cell subpopulations  
revealed differences in their transcriptional and open-chromatin dynamics. Transcriptionally, two  
distinct subpopulations were found, one characterized by transcription of granzyme genes, and the  
other by upregulation of IL7R (**Fig. 4A**; left). Integrating open-chromatin landscape with their  
195 transcriptional profiles from the same individuals led to differentiating V $\delta$ 1 (higher in GZMB and  
GZMH) and V $\delta$ 2 (higher in GZMK) T cell populations (**Fig. 4A**; right). Notably, the vaccination did not  
affect the proportion of the subpopulations identified (**Fig. S5A-B**). Interestingly however, MMR  
induced a metabolic shift in  $\gamma\delta$  T cells at the transcriptional level, with downregulation of genes  
involved in cellular respiration and ATP synthesis (**Fig. 4B-C**), exemplified by *NDUFA3*, *ATP5F1E*,  
200 *ATP5MD*, and *ATP5MG*. We subsequently investigated the functional consequences for V $\delta$ 2 T cells (the  
most abundant  $\gamma\delta$ -T cell population in the blood) by flow cytometry.

There was a small but significant decrease in V $\delta$ 2 T cells present in the PBMC fraction of MMR-  
vaccinated individuals ( $p = 0.0425$ ); a pattern that was not present in the placebo controls (**Fig. 5A**).  
On the other hand, we did not find any significant differences in relative abundance of subpopulations  
205 expressing CD27 and/or CD45RA, indicating MMR did not have strong effects on classical memory-V $\delta$ 2  
T cell formation (**Fig. S6A**). There were also no changes in the expressions of CTLA4, PD1, LAG3, and  
TIM3, markers that are commonly associated with T cell dysfunction or exhaustion. Notably, following  
stimulation of the  $\gamma\delta$  T cell receptor using anti-CD3/anti-CD28 beads, the percentage (but not the mean  
fluorescence intensity [MFI]) of V $\delta$ 2 T cells positive for TNF or IFN $\gamma$  increased (**Fig. 5B, Fig. S6B**). This  
210 indicates that the  $\gamma\delta$  T cell population has become more responsive towards secondary stimulation, a  
feature resembling the classical monocyte trained immunity. Unstimulated V $\delta$ 2 T cells showed a trend  
towards lower expression of the degranulation marker CD107a after MMR vaccination (**Fig. S6C**); this  
effect was not present in CD3/CD28-stimulated V $\delta$ 2 T cells, which showed no difference between  
timepoints in the percentage of cells staining positive for CD107a, granzyme B, or perforin (**Fig. 5C**).



215 These data suggest that granule release by V $\delta$ 2 cells is more tightly regulated at baseline following MMR vaccination, but that this effector function is not weaker following stimulation.

The single-cell analyses revealed that unstimulated  $\gamma\delta$  T cells modulate genes associated with oxidative phosphorylation (**Fig. 4B-C**). Therefore, we determined the functional metabolism profile of V $\delta$ 2 T cells before and after MMR vaccination using SCENITH (23). This flow cytometry-based technique uses  
220 puromycin incorporation as a proxy for protein synthesis activity, which in itself reflects a significant portion of total ATP used by the cell. Briefly, we measured protein synthesis levels (puromycin MFI; **Fig. 5D**) upon treatment with metabolic inhibitors. This allowed us to calculate fatty acid/amino acid oxidation capacity (**Fig. 5E**), glycolytic capacity (**Fig. 5F**), mitochondrial dependence (**Fig. 5G**), and glucose dependence (**Fig. 5H**) of V $\delta$ 2 T cells. These experiments revealed a trend towards higher  
225 protein synthesis activity ( $p = 0.203$ ) in unstimulated V $\delta$ 2 T cells following MMR vaccination. The same pattern was visible following stimulation with isopentenyl pyrophosphate (IPP, a common antigen specifically for V $\delta$ 2 T cells;  $p = 0.129$ ), and was statistically significant following CD3/CD28 stimulation ( $p = 0.00391$ ). The metabolic processes fueling this change remained unclear however, as only CD3/CD28-stimulated V $\delta$ 2 T cells had changed metabolic parameters: a decrease in glycolytic capacity  
230 and thus a concomitant increased dependence on mitochondrial energy metabolism. In conclusion, these data show, for the first time, transcriptional and functional changes consistent with induction of trained immunity in  $\gamma\delta$  T cells following MMR vaccination.

## DISCUSSION

235 Trained immunity entails the process of boosting innate immune function following vaccination or infection (4), and this process has been proposed to mediate at least in part the heterologous protective effects of live attenuated vaccines such as BCG or MMR. While extensive studies have documented induction of trained immunity by BCG (including but not limited to (3, 5, 6, 8-10, 22, 24, 25)), nothing is known regarding the capacity of MMR vaccination to induce trained immunity. We  
240 performed a randomized, placebo-controlled trial investigating the potential of the MMR vaccine to

induce innate immune memory. Using single-cell multi-omics transcriptional and epigenetic analysis combined with functional immunological and metabolic assays, we show that MMR vaccination induces a trained immunity phenotype in  $\gamma\delta$  T cells, while it has limited effects on monocyte function.

245 Most studies on the heterologous protection induced by certain vaccines such as BCG or influenza have focused on the induction of trained immunity in myeloid cells (3, 26). MMR vaccination has beneficial heterologous effects on overall mortality in children, therefore, we hypothesized that it also induces trained immunity. MMR induced some modest changes in the chromatin accessibility and transcriptional programs of monocytes, related to cellular responses to metal ions (specifically calcium; 250 upregulated) and cellular adhesion (downregulated). However, these transcriptional effects did not result in significant effects on monocyte-derived cytokine production, despite the well-known role of calcium-dependent signaling in the function of immune cells (27-29). Future studies should be conducted to analyze in more depth the role of these pathways in monocytes after MMR vaccination, and if these changes are functionally relevant.

255 Instead, we discovered that MMR induced much stronger transcriptomic and functional changes in the innate lymphoid population of  $\gamma\delta$  T cells. In this respect, MMR vaccination modulated the expression of genes involved in aerobic energy metabolism. We sought to functionally validate these findings and therefore closely examined V $\delta$ 2 T cells, the most abundant  $\gamma\delta$  T cell subpopulation in human peripheral 260 blood. MMR vaccination preceded a significant increase in the proportion of V $\delta$ 2 T cells producing TNF and IFN $\gamma$ , and these cells were more metabolically active, especially after CD3/CD28 stimulation. Our findings indicate that  $\gamma\delta$  T cells have a more activated phenotype in MMR-vaccinated individuals, providing a plausible mechanistic explanation for the NSEs conferred by MMR.

265 Because of their non-canonical antigen-recognition mechanisms, the exact receptors and pathways that trigger the effects of MMR vaccination on  $\gamma\delta$  T cell transcriptome and function remain to be

investigated by future studies. Previous gene expression and functional analyses demonstrate that  $\gamma\delta$  T cells have hybrid innate- and adaptive immune functions; the single-cell transcriptome of these cells has similarities to both CD8<sup>+</sup> T cells and NK cells (30). Their innate-like features encompass the ability  
270 to mediate antibody-dependent cellular cytotoxicity, phagocytose pathogens, and direct rapid non-specific responses against threats (31). On the other hand, classic adaptive features include somatic recombination of their functional T cell receptor, memory cell formation, and professional antigen-presenting capabilities (32). Unlike classical  $\alpha\beta$  T-cell receptor signaling antigen-recognition by  $\gamma\delta$  T cells is not MHC-restricted (33). V $\delta$ 2 T cells, for example, predominantly recognize phosphoantigens  
275 such as isopentenyl pyrophosphate, (E)-4-Hydroxy-3-methyl-but-2-enyl pyrophosphate (HMBPP) in the context of butyrophilins 2A1 and 3A1 ((34)), and tetanus toxoid (35, 36). In cancer immunology,  $\gamma\delta$  T cells are known to exert strong anti-tumor effects by the release of pro-inflammatory cytokines, granzymes, perforin and via activation of apoptosis-triggering receptors (36), although pro-tumor effects have also been described ((37)). Interestingly, previous studies have suggested that IFN $\gamma$ -  
280 producing  $\gamma\delta$  T cells are more dependent on glycolysis than on oxidative metabolism (38), whereas our analyses show increased reliance on mitochondrial metabolism and simultaneously an increase in IFN $\gamma$ -producing V $\delta$ 2 T cells. This contrast could potentially be explained by the differences in used models: our study uses human samples rather than mice, and the previous work was done in a cancer model. Future studies need to confirm our results and assess the full array of pathways and functional  
285 consequences induced by MMR on  $\gamma\delta$  T cells.

Our data have several practical and theoretical implications. On the one hand, the differences between the BCG-induced (myeloid-dependent) and MMR-induced (lymphoid-dependent) trained immunity programs demonstrate that different vaccines can induce different types of innate immune memory.  
290 Remarkably, even when considering effects on lymphoid cells with innate properties, a major difference emerges between MMR-induced effects on  $\gamma\delta$  T cells rather than BCG effects on NK cells. On the other hand, demonstrating that MMR is also able to induce trained immunity could lead to the

hypothesis that it may have beneficial heterologous effects in other groups of individuals with increased susceptibility to infections. Indeed, MMR has been proposed as a potential approach to prevent COVID19 in the period before the SARS-CoV-2 specific vaccines were available (39, 40). In a case-control study during a recent measles outbreak, a reduced COVID19 incidence was detected in men vaccinated with MMR (41).

Not only induction of trained immunity has been proposed as a mechanism explaining the heterologous effects of MMR on COVID-19. An inverse correlation between COVID-19 disease severity and MMR-specific IgG-titers was found in adults in the United States (42). A potential explanation for this observation could lie in cross-reactivity against structurally similar components of SARS-CoV-2 and MMR epitopes, which was described by Marakosova et al (43, 44). However, this cannot account for the entire breadth of protection offered by MMR vaccines and these studies did not investigate the potential impact of MMR on innate immune cells.

Our study also has some limitations. First, the sample size was limited due to the exploratory nature of this investigation, which barred us from investigating the host and environmental factors that impact these effects of MMR vaccination. Future research should encompass an increased number of participants and a broader range of study parameters such as microbiome constituents, epigenetic histone modifications, and more follow-up timepoints, similar to the large-scale vaccination studies performed with BCG (8, 25). Second, while NK cell activation related inflammatory proteins were increased in the serum of MMR-vaccinated individuals, we could not substantiate this finding with functional NK cell experiments due to limitations in the cell numbers available. Third, it is unknown which MMR components triggered  $\gamma\delta$  T cell activation, or if they reacted for example upon interaction with other activated cells. Moreover, in this study we in fact re-vaccinated adults who had previously received the MMR vaccine as part of the Dutch national vaccination program. Future studies should investigate if primary MMR vaccination has similar effects.

320 In conclusion, MMR is the first described vaccine that induces a program of trained immunity based  
on long-term transcriptional and functional changes of  $\gamma\delta$  T cells. The immunological and metabolic  
cellular responses to MMR reveal  $\gamma\delta$  T cells as a novel population of innate-like cells that mediate  
trained immunity. Our findings warrant further research to investigate the possibility that  $\gamma\delta$  T cells  
activation may be a component of trained immunity programs of other vaccines as well, and to assess  
325 the potential to improve vaccine efficacy by inducing these effects.

## References and Notes

1. P. Aaby *et al.*, The non-specific and sex-differential effects of vaccines. *Nature Reviews Immunology* **20**, 464-470 (2020).
- 330 2. L. C. J. de Bree *et al.*, Non-specific effects of vaccines: Current evidence and potential implications. *Semin Immunol* **39**, 35-43 (2018).
3. J. Kleinnijenhuis *et al.*, Bacille Calmette-Guerin induces NOD2-dependent nonspecific protection from reinfection via epigenetic reprogramming of monocytes. *Proc Natl Acad Sci U S A* **109**, 17537-17542 (2012).
- 335 4. M. G. Netea *et al.*, Defining trained immunity and its role in health and disease. *Nat Rev Immunol* **20**, 375-388 (2020).
5. R. J. W. Arts *et al.*, Immunometabolic Pathways in BCG-Induced Trained Immunity. *Cell Rep* **17**, 2562-2571 (2016).
6. M. G. Netea, J. Quintin, J. W. van der Meer, Trained immunity: a memory for innate host  
340 defense. *Cell Host Microbe* **9**, 355-361 (2011).
7. V. P. Mourits, J. C. Wijkman, L. A. Joosten, M. G. Netea, Trained immunity as a novel therapeutic strategy. *Curr Opin Pharmacol* **41**, 52-58 (2018).
8. V. A. Koeken *et al.*, BCG vaccination in humans inhibits systemic inflammation in a sex-dependent manner. *J Clin Invest* **130**, 5591-5602 (2020).
- 345 9. R. J. W. Arts *et al.*, BCG Vaccination Protects against Experimental Viral Infection in Humans through the Induction of Cytokines Associated with Trained Immunity. *Cell Host Microbe* **23**, 89-100.e105 (2018).
10. E. J. Giamarellos-Bourboulis *et al.*, Activate: Randomized Clinical Trial of BCG Vaccination against Infection in the Elderly. *Cell* **183**, 315-323.e319 (2020).
- 350 11. J. P. T. Higgins *et al.*, Association of BCG, DTP, and measles containing vaccines with childhood mortality: systematic review. *BMJ* **355**, i5170 (2016).
12. C. Di Pietrantonj, A. Rivetti, P. Marchione, M. G. Debalini, V. Demicheli, Vaccines for measles, mumps, rubella, and varicella in children. *Cochrane Database of Systematic Reviews*, (2021).
13. S. Byberg *et al.*, A general measles vaccination campaign in urban Guinea-Bissau: Comparing child mortality among participants and non-participants. *Vaccine* **35**, 33-39 (2017).
- 355 14. S. Sorup, A. K. G. Jensen, P. Aaby, C. S. Benn, Revaccination With Measles-Mumps-Rubella Vaccine and Infectious Disease Morbidity: A Danish Register-based Cohort Study. *Clin Infect Dis* **68**, 282-290 (2019).
15. S. M. A. J. Tielemans *et al.*, Non-specific effects of measles, mumps, and rubella (MMR) vaccination in high income setting: population based cohort study in the Netherlands. *BMJ* **358**, j3862 (2017).
- 360 16. S. Sorup *et al.*, Live vaccine against measles, mumps, and rubella and the risk of hospital admissions for nontargeted infections. *JAMA* **311**, 826-835 (2014).
17. P. T. Schmidt *et al.*, A role for pancreatic polypeptide in the regulation of gastric emptying and short-term metabolic control. *J Clin Endocrinol Metab* **90**, 5241-5246 (2005).
- 365 18. D. Foell *et al.*, Proinflammatory S100A12 can activate human monocytes via Toll-like receptor 4. *Am J Respir Crit Care Med* **187**, 1324-1334 (2013).
19. Y. Kitamoto, R. A. Veile, H. Donis-Keller, J. E. Sadler, cDNA sequence and chromosomal localization of human enterokinase, the proteolytic activator of trypsinogen. *Biochemistry* **34**, 4562-4568 (1995).
- 370 20. I. MacIntyre, M. Alevizaki, P. J. Bevis, M. Zaidi, Calcitonin and the peptides from the calcitonin gene. *Clin Orthop Relat Res*, 45-55 (1987).
21. B. Zhang *et al.*, Single-cell RNA sequencing reveals induction of distinct trained-immunity programs in human monocytes. *J Clin Invest* **132**, (2022).
- 375 22. L. Kong *et al.*, Single-cell transcriptomic profiles reveal changes associated with BCG-induced trained immunity and protective effects in circulating monocytes. *Cell Reports* **37**, 110028 (2021).

23. R. J. Argüello *et al.*, SCENITH: A Flow Cytometry-Based Method to Functionally Profile Energy Metabolism with Single-Cell Resolution. *Cell Metab* **32**, 1063-1075.e1067 (2020).
- 380 24. J. Kleinnijenhuis *et al.*, BCG-induced trained immunity in NK cells: Role for non-specific protection to infection. *Clin Immunol* **155**, 213-219 (2014).
25. M. Stražar *et al.*, The influence of the gut microbiome on BCG-induced trained immunity. *Genome Biology* **22**, 275 (2021).
26. F. Wimmers *et al.*, The single-cell epigenomic and transcriptional landscape of immunity to influenza vaccination. *Cell* **184**, 3915-3935.e3921 (2021).
- 385 27. J. Bernardo *et al.*, Adherence-dependent calcium signaling in monocytes: induction of a CD14-high phenotype, stimulus-responsive subpopulation. *J Immunol Methods* **209**, 165-175 (1997).
28. M. Rossol *et al.*, Extracellular Ca<sup>2+</sup> is a danger signal activating the NLRP3 inflammasome through G protein-coupled calcium sensing receptors. *Nature Communications* **3**, 1329 (2012).
- 390 29. M. Vig, J.-P. Kinet, Calcium signaling in immune cells. *Nature Immunology* **10**, 21-27 (2009).
30. G. Pizzolato *et al.*, Single-cell RNA sequencing unveils the shared and the distinct cytotoxic hallmarks of human TCRV $\alpha$ 1 and TCRV $\alpha$ 2  $\beta$ 3  $\beta$ 4 T lymphocytes. *Proceedings of the National Academy of Sciences* **116**, 11906-11915 (2019).
- 395 31. A. R. Kazen, E. J. Adams, Evolution of the V, D, and J gene segments used in the primate gammadelta T-cell receptor reveals a dichotomy of conservation and diversity. *Proc Natl Acad Sci U S A* **108**, E332-340 (2011).
32. Y. Shen *et al.*, Adaptive immune response of Vgamma2Vdelta2+ T cells during mycobacterial infections. *Science* **295**, 2255-2258 (2002).
- 400 33. M. Munoz-Ruiz *et al.*, Human CD3gamma, but not CD3delta, haploinsufficiency differentially impairs gammadelta versus alphabeta surface TCR expression. *BMC Immunol* **14**, 3 (2013).
34. M. Rigau *et al.*, Butyrophilin 2A1 is essential for phosphoantigen reactivity by  $\gamma\delta$  T cells. *Science* **367**, eaay5516 (2020).
- 405 35. G. De Libero, S. Y. Lau, L. Mori, Phosphoantigen Presentation to TCR gammadelta Cells, a Conundrum Getting Less Gray Zones. *Front Immunol* **5**, 679 (2014).
36. T. Hoeres, M. Smetak, D. Pretscher, M. Wilhelm, Improving the Efficiency of Vgamma9Vdelta2 T-Cell Immunotherapy in Cancer. *Front Immunol* **9**, 800 (2018).
37. G. Chabab, C. Barjon, N. Bonnefoy, V. Lafont, Pro-tumor  $\gamma\delta$  T Cells in Human Cancer: Polarization, Mechanisms of Action, and Implications for Therapy. *Frontiers in Immunology* **11**, (2020).
- 410 38. N. Lopes *et al.*, Distinct metabolic programs established in the thymus control effector functions of  $\gamma\delta$  T cell subsets in tumor microenvironments. *Nat Immunol* **22**, 179-192 (2021).
39. M. Taheri Soodejani, M. Basti, S. M. Tabatabaei, K. Rajabkhah, Measles, mumps, and rubella (MMR) vaccine and COVID-19: a systematic review. *Int J Mol Epidemiol Genet* **12**, 35-39 (2021).
- 415 40. E. N. Fedrizzi *et al.*, EFFICACY OF THE MEASLES-MUMPS-RUBELLA (MMR) VACCINE IN THE REDUCING THE SEVERITY OF COVID-19: AN INTERIM ANALYSIS OF A RANDOMISED CONTROLLED CLINICAL TRIAL. *medRxiv*, 2021.2009.2014.21263598 (2021).
- 420 41. L. Lundberg *et al.*, Recent MMR vaccination in health care workers and Covid-19: A test negative case-control study. *Vaccine* **39**, 4414-4418 (2021).
42. E. Gold Jeffrey *et al.*, Analysis of Measles-Mumps-Rubella (MMR) Titers of Recovered COVID-19 Patients. *mBio* **11**, e02628-02620 (2020).
43. E. Maraksova, A. Baranova, MMR Vaccine and COVID-19: Measles Protein Homology May Contribute to Cross-Reactivity or to Complement Activation Protection. *mBio* **12**, (2021).
- 425 44. V. Mysore *et al.*, Protective heterologous T cell immunity in COVID-19 induced by the trivalent MMR and Tdap vaccine antigens. *Med (N Y)* **2**, 1050-1071 e1057 (2021).

45. B. L. Hønge, M. S. Petersen, R. Olesen, B. K. Møller, C. Erikstrup, Optimizing recovery of frozen human peripheral blood mononuclear cells for flow cytometry. *PLOS ONE* **12**, e0187440 (2017).  
430
46. H. Heaton *et al.*, Souporecell: robust clustering of single-cell RNA-seq data by genotype without reference genotypes. *Nature Methods* **17**, 615-620 (2020).
47. T. Stuart *et al.*, Comprehensive Integration of Single-Cell Data. *Cell* **177**, 1888-1902.e1821 (2019).
- 435 48. G. Finak *et al.*, MAST: a flexible statistical framework for assessing transcriptional changes and characterizing heterogeneity in single-cell RNA sequencing data. *Genome Biology* **16**, 278 (2015).
49. J. M. Granja *et al.*, ArchR is a scalable software package for integrative single-cell chromatin accessibility analysis. *Nature Genetics* **53**, 403-411 (2021).
- 440 50. Y. Zhang *et al.*, Model-based Analysis of ChIP-Seq (MACS). *Genome Biology* **9**, R137 (2008).
51. M. T. Weirauch *et al.*, Determination and inference of eukaryotic transcription factor sequence specificity. *Cell* **158**, 1431-1443 (2014).
52. H. Wickham *et al.*, Welcome to the Tidyverse. *Journal of open source software* **4**, 1686 (2019).
- 445 53. M. Hirschfeld, Y. Ma, J. H. Weis, S. N. Vogel, J. J. Weis, Cutting Edge: Repurification of Lipopolysaccharide Eliminates Signaling Through Both Human and Murine Toll-Like Receptor 2. *The Journal of Immunology* **165**, 618 (2000).
54. D. Rosati *et al.*, Activation of cytokine responses by *Candida africana*. *Med Mycol* **60**, (2022).
- 450 55. P. A. Debisarun *et al.*, Induction of trained immunity by influenza vaccination - impact on COVID-19. *PLOS Pathogens* **17**, e1009928 (2021).



## Acknowledgements

455 We thank the volunteers of the BCG-PLUS cohort for their participation in this study. In addition, we thank our team of research nurses from the Radboud Technology Center Clinical Studies for aiding in participant visits. We are very grateful that Diletta Rosati prepared heat-killed *Candida albicans* for use in PBMC stimulation experiments. Likewise, we thank Jelle Gerretsen for preparing the heat-killed *S. aureus* we used in PBMC stimulation experiments.

## 460 Funding

RJR is supported by a personal PhD-grant from the Radboud university medical center. MGN is supported by an ERC Advanced Grant (European Union's Horizon 2020 research and innovation program, grant agreement no. 833247) and a Spinoza grant from the Netherlands Organization for Scientific Research (NWO). YL is supported by an ERC starting Grant (948207) and a Radboud University Medical Centre Hypatia Grant (2018). This project has received funding from the European Union's Horizon 2020 research and innovation programme under the Marie Skłodowska-Curie grant agreement No.: 955321.

## Author contributions:

470 RJR, PAD, and JBB contributed equally to this work, and each has the right to list themselves first in author order on their CVs.

## CRedit statement:

475 Conceptualization: MGN, YL, RJR, PAD, JBB, KP  
Data Curation: PAD, RJR, JBB, OB, GK  
Formal analysis: JBB, RJR, PAD, OB, GK, VACMK  
Funding acquisition: YL, MGN, RJR  
Investigation: PAD, RJR, TKS, OB, GK, AS, HB, HD, HL, EJdM, YA  
Methodology: PAD, RJR, JBB, SK, YL, KP, MGN  
480 Project administration: PAD, RJR, JtO, MGN  
Resources: RJR, PAD, JBB, KP, EJdM, KLG, NR, PNO, LM, HS, OA, AB, YA, SK, YL, MGN  
Software: JBB, RJR, PAD, OB, VACMK, YL  
Supervision: YL, MGN  
Verification: RJR, JBB, TKS, KP  
485 Visualization: RJR, JBB  
Writing – original draft: RJR, PAD, JBB, MGN  
Writing – review & editing: RJR, PAD, JBB, MGN

## Competing interests

490 MGN is a scientific founder and member of the scientific advisory board of Trained Therapeutix Discovery.

## Data and materials availability

495 The sequencing data used in this manuscript will be made accessible in the EGA archive (EGAS00001006787). Olink data will be added as a supplementary file. Other data are available upon request to the corresponding author.

## Supplementary materials

500 Materials and methods  
Figs. S1 – S6  
Tables S1 – S3  
References: 45-55

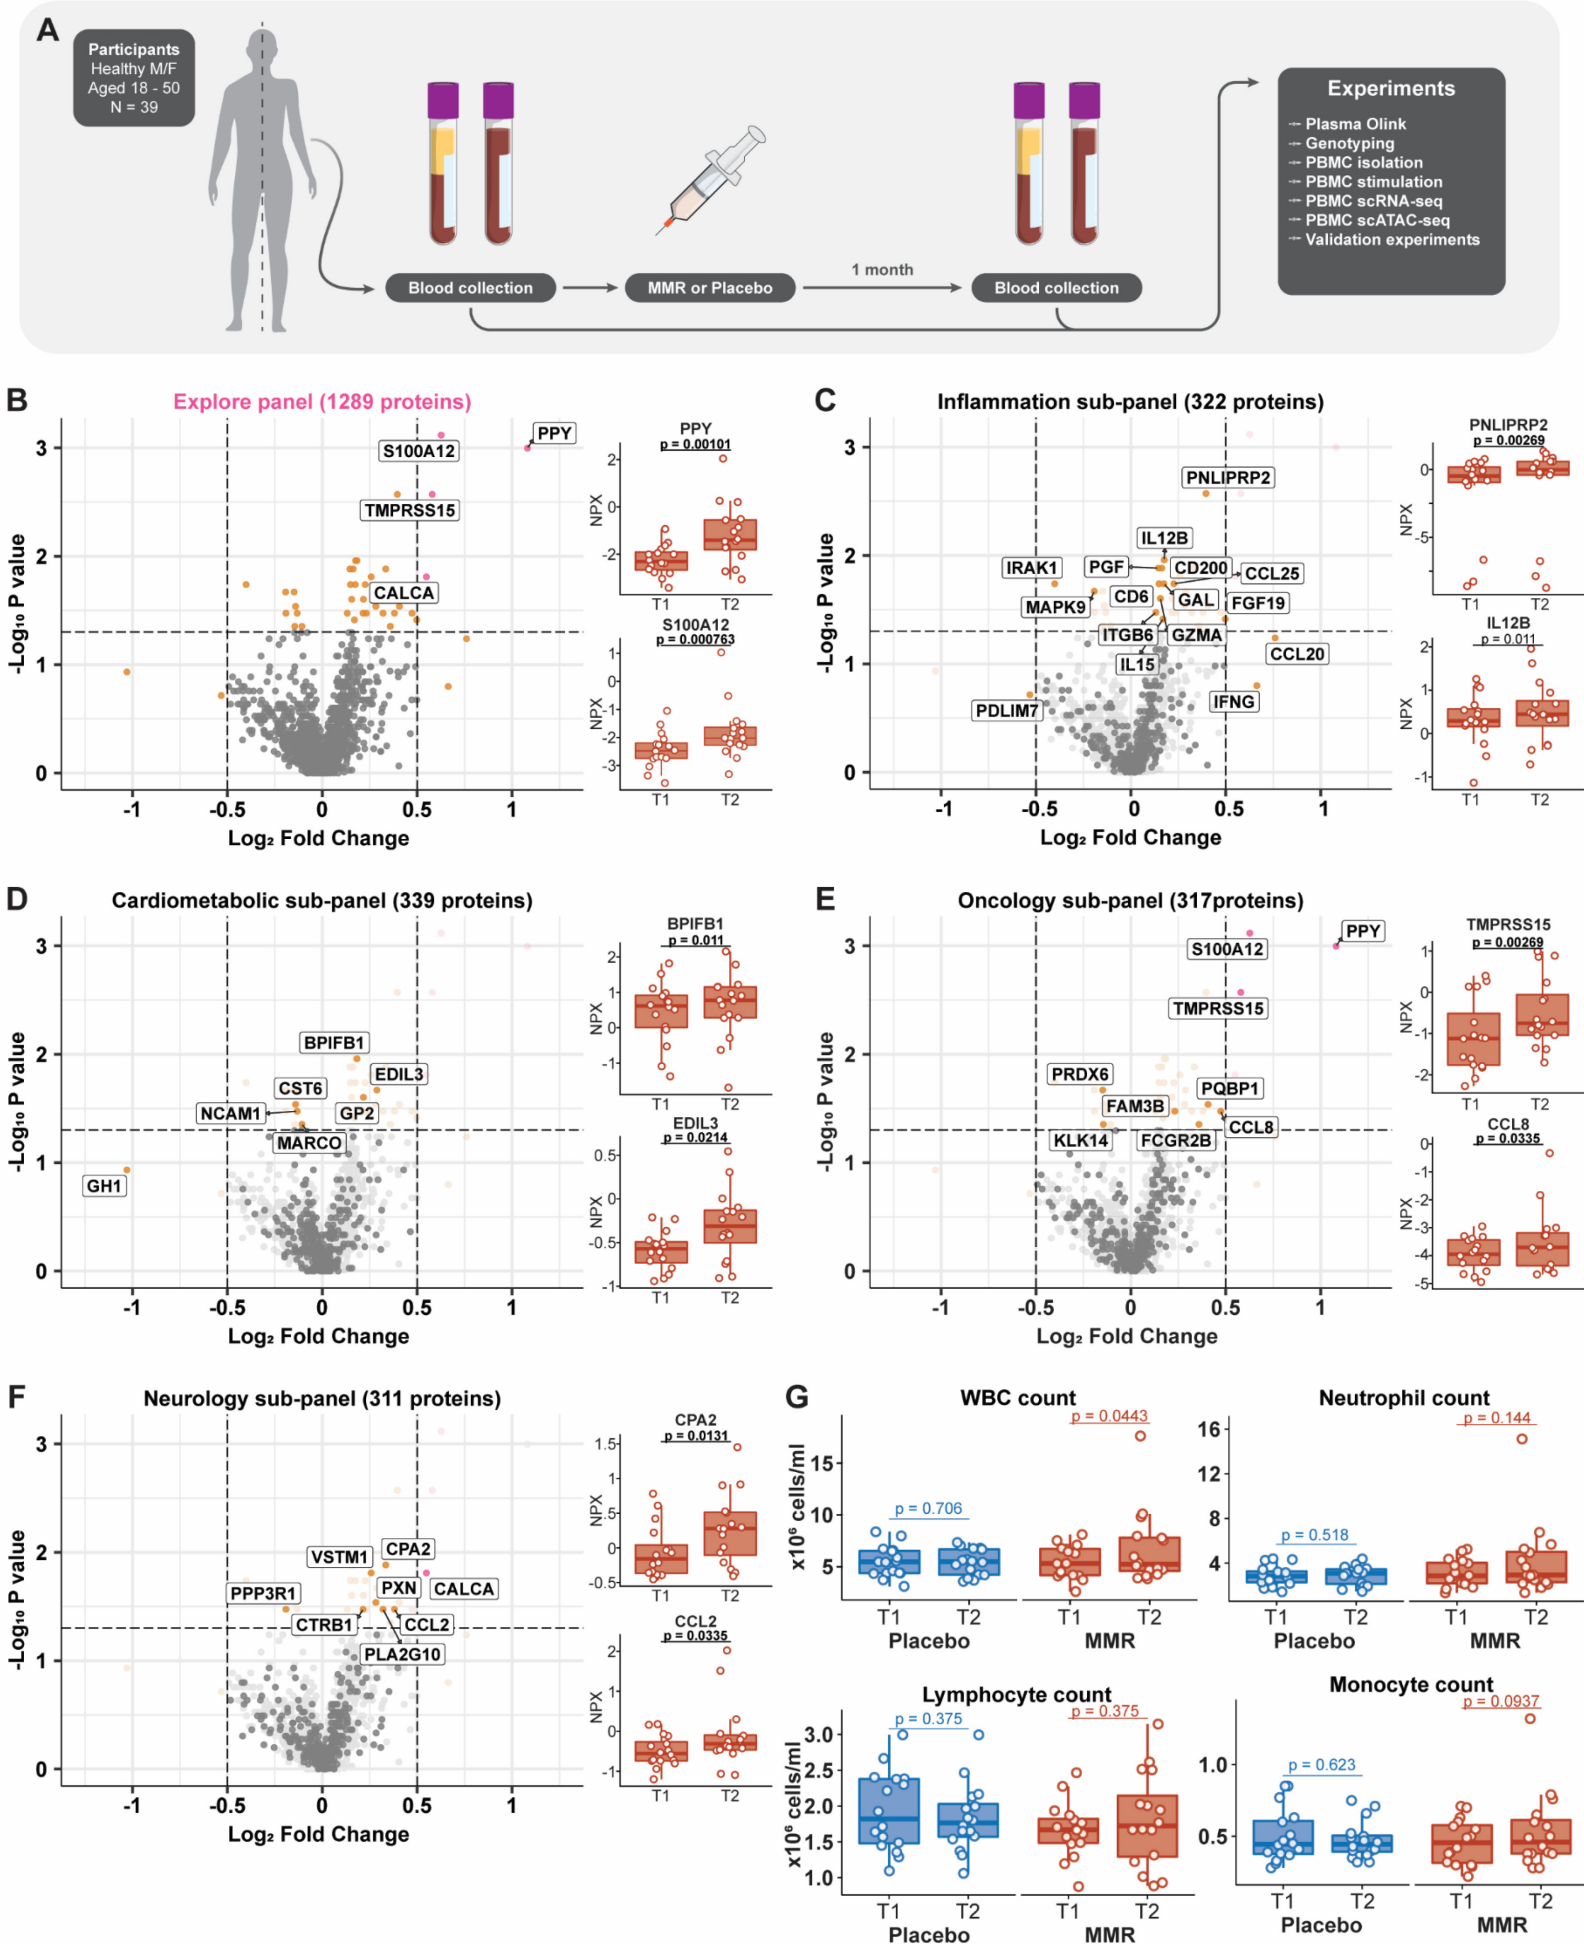

**Fig. 1. Study setup, plasma proteomics analysis after MMR vaccination, and white blood cell counts.**

555 (A) Setup of the present randomized, placebo-controlled trial of MMR vaccination. (B) Volcano plot of Olink targeted proteomics (1289 analyzed proteins in total) in plasma, after MMR vaccination (n = 16). (C-F) Volcano plots of sub-categories of the plasma proteome measured by proximity extension assay technology (Olink). In volcano plots for sub-panels, the full panel is depicted in light gray as the background. The side plots of B-F show the relative expression values (NPX) of selected proteins in each (sub)panel. (G) Total- and differentiated white blood cell counts (WBC), before and after  
560 vaccination in placebo and MMR-vaccinated groups. The p-value cutoff for the volcano plots is unadjusted  $p < 0.05$ . WBC, white blood cell; T1, baseline; T2, one month after treatment.

**A**

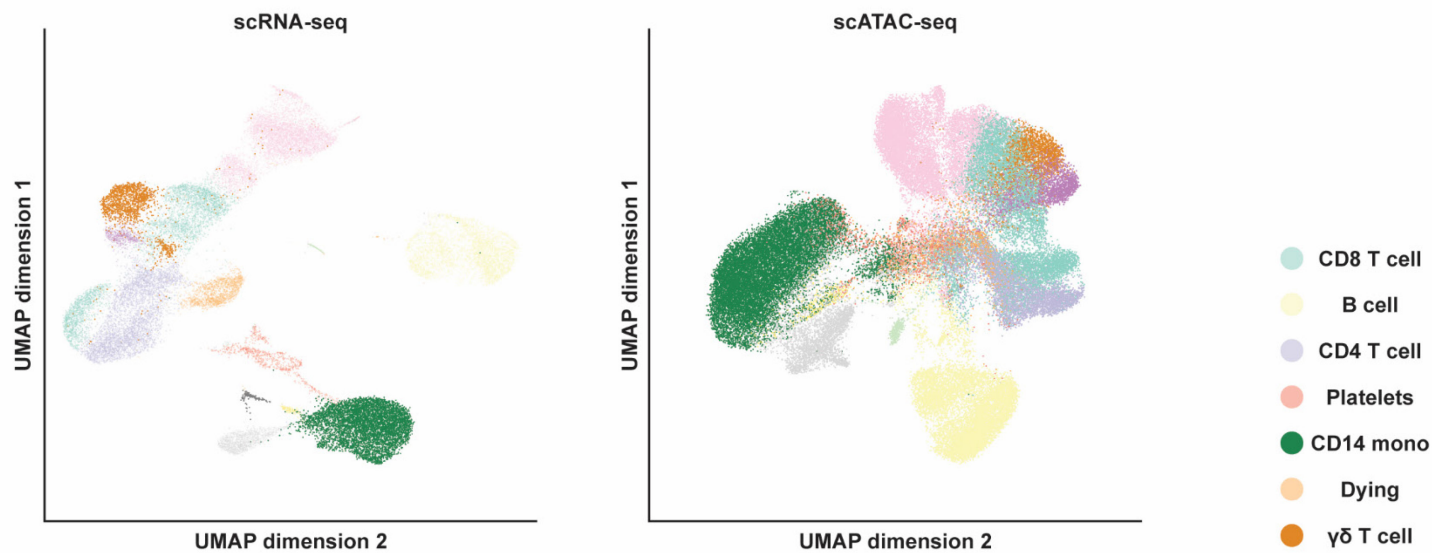

**B**

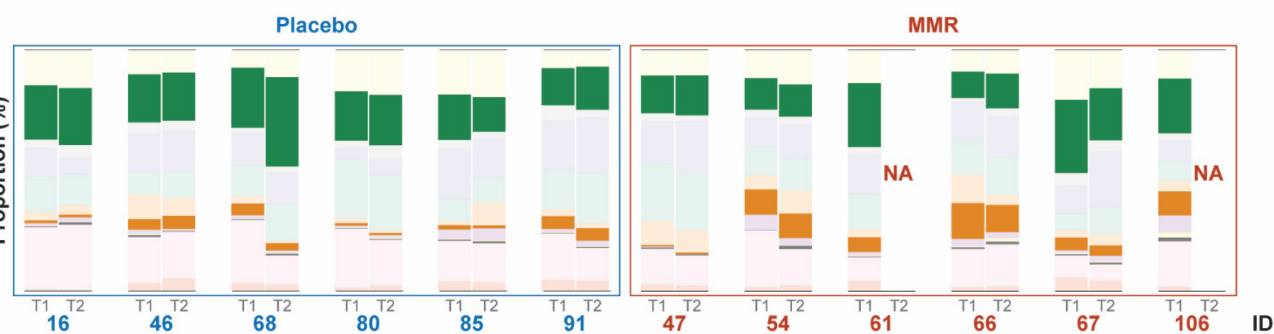

**C**

Differentially expressed genes (T2 vs T1), per celltype

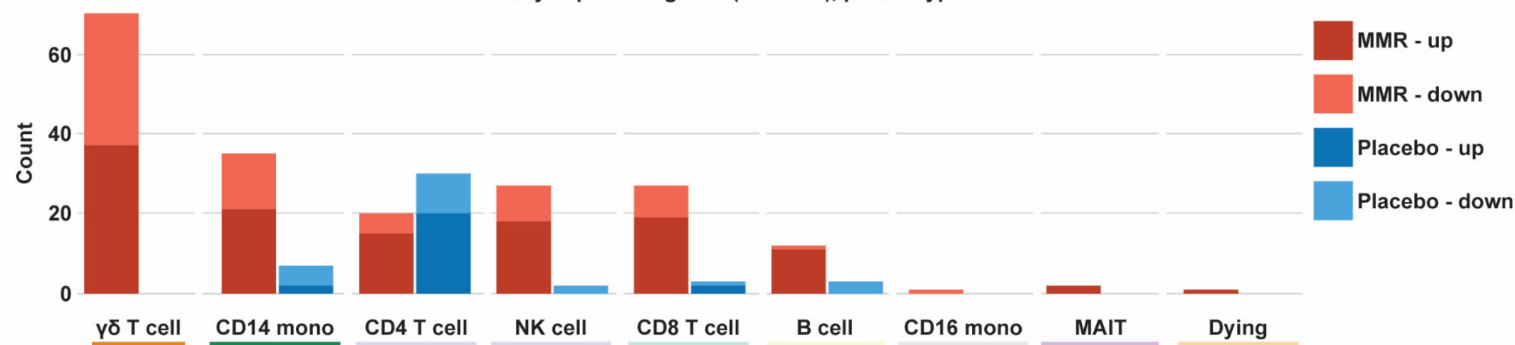

Differentially accessible genes (T2 vs T1), per celltype

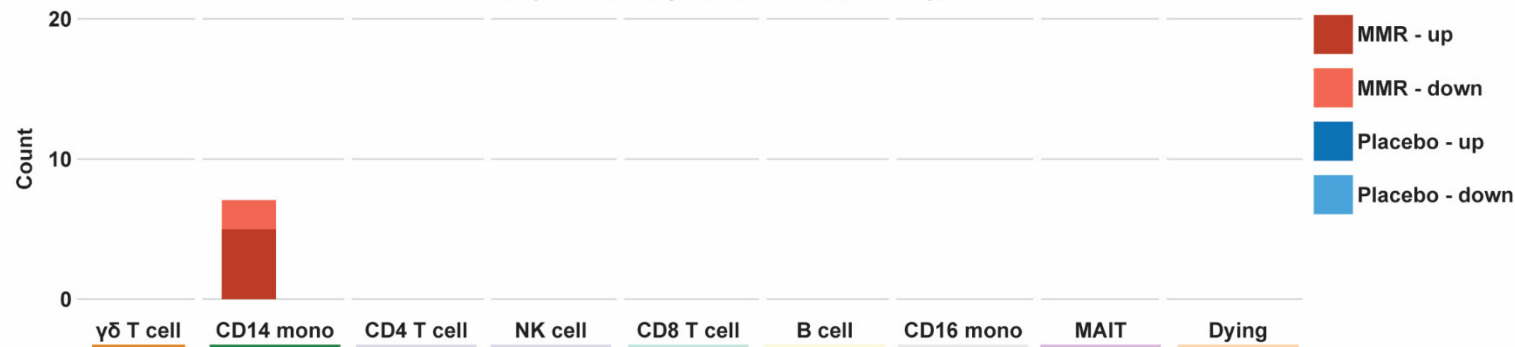

615 **Fig. 2. Single-cell analysis of PBMCs following MMR vaccination.** (A) UMAP analysis of single-cell RNA-seq (left) and single-cell ATAC-seq of PBMCs (right). (B) Proportions of cell types annotated according to the scRNA seq data in placebo and MMR samples. (C) Differentially expressed genes (scRNA seq) per cell type, between baseline (T1) and one month after placebo or MMR (T2). (D) Differentially accessible genes (scATAC-seq) per cell type, between baseline (T1) and one month after placebo or MMR (T2).

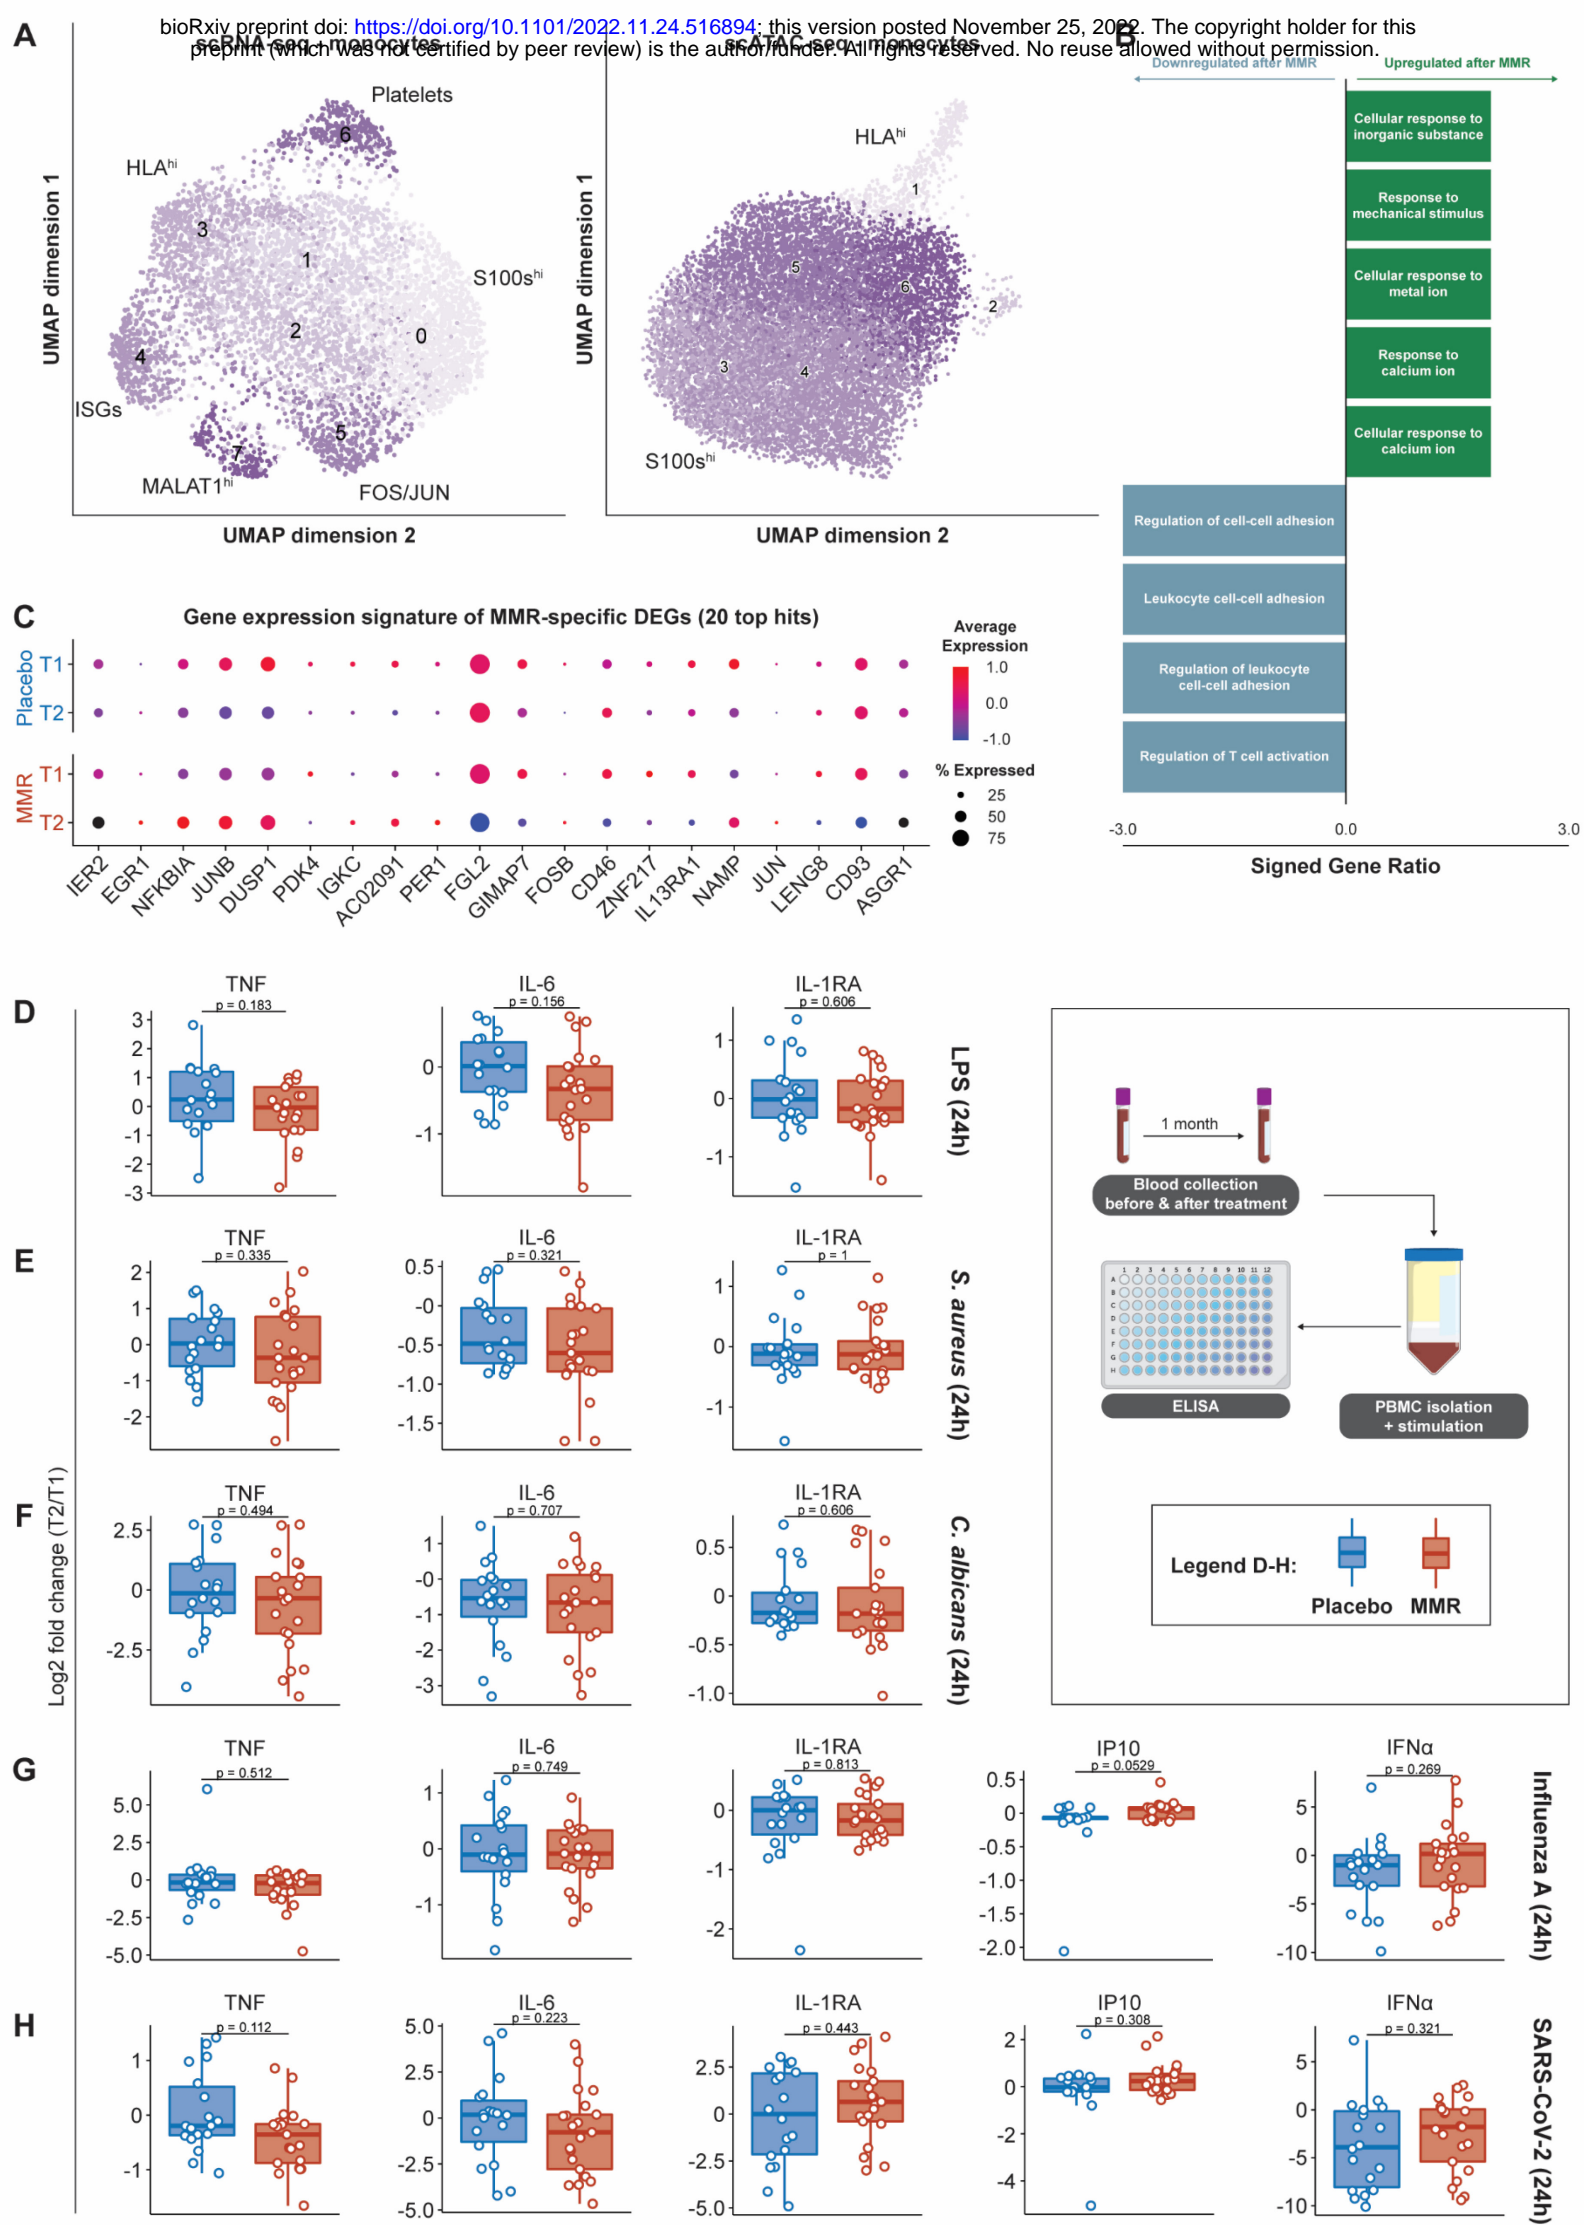

**Fig. 3. Single-cell analysis of monocyte subpopulations, and monocyte-associated cytokine production by PBMCs.** (A) UMAP analysis and sub-population identification of single-cell RNA-seq (left) and single-cell ATAC-seq (right), specifically in monocytes. (B) Pathway enrichment of genes that are differentially expressed in monocytes after MMR vaccination. (C) Top 20 differentially expressed genes in monocytes following MMR vaccination, by timepoint and treatment group. (D-H) Monocyte-associated cytokines produced by PBMCs following diverse stimulations; the data are expressed as log<sub>2</sub> fold-changes between baseline and one month after treatment.

625

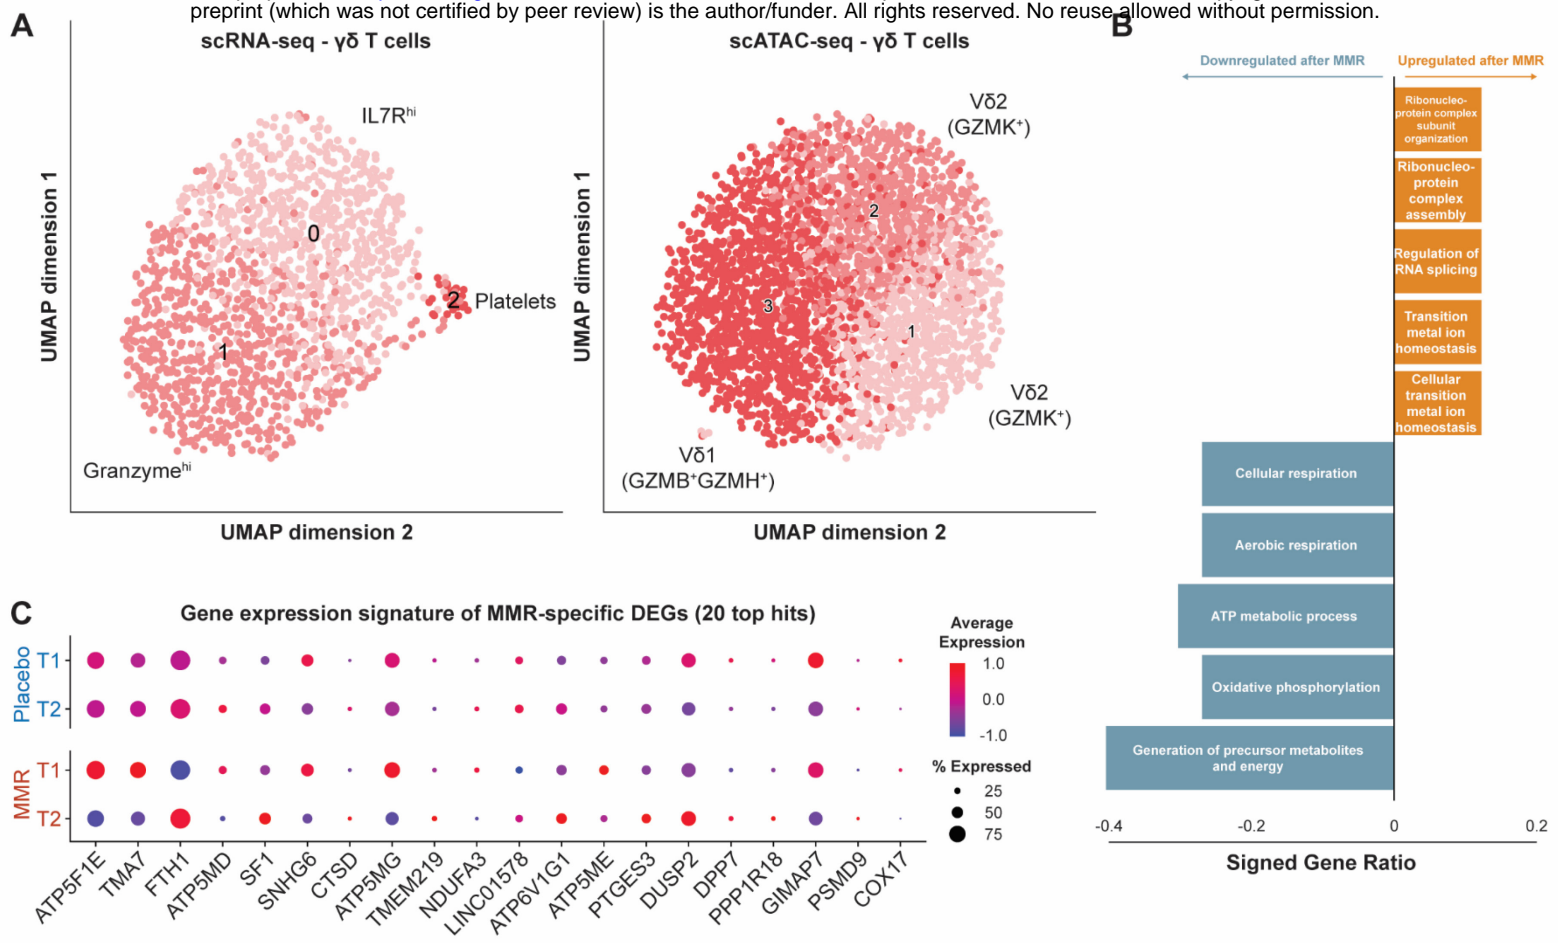

**Fig. 4. Single-cell analysis of  $\gamma\delta$  T cell populations.** (A) UMAP analysis and sub-population identification of single-cell RNA-seq (left) and single-cell ATAC-seq (right), specifically in  $\gamma\delta$  T cells. (B) Pathway enrichment analysis of genes that are differentially expressed in  $\gamma\delta$  T cells after MMR vaccination. (C) Top 20 differentially expressed genes in  $\gamma\delta$  T cells following MMR vaccination, by timepoint and treatment group.

655



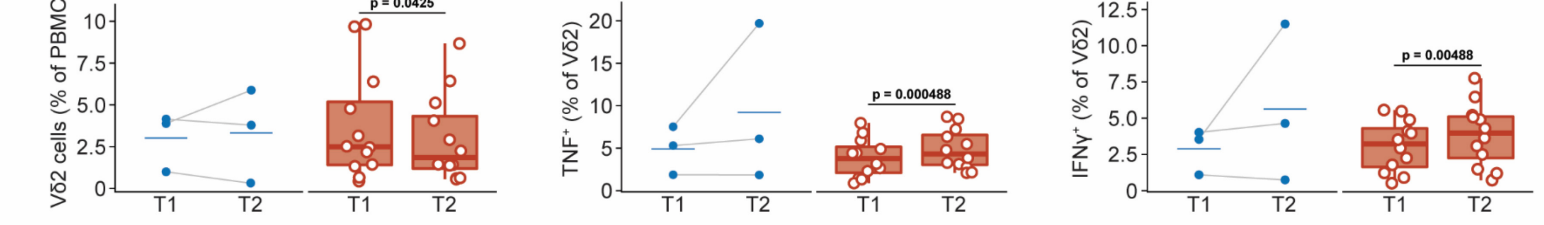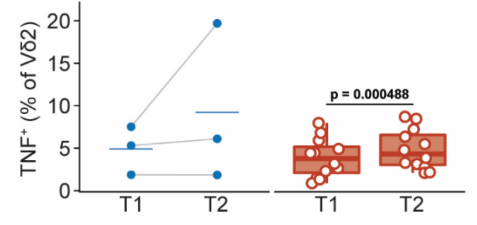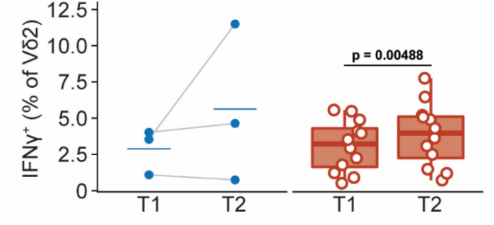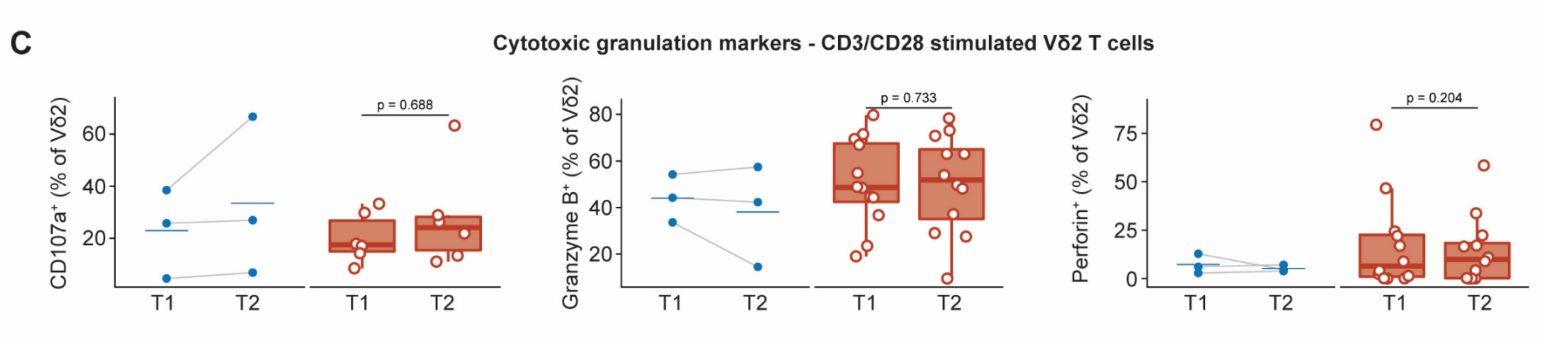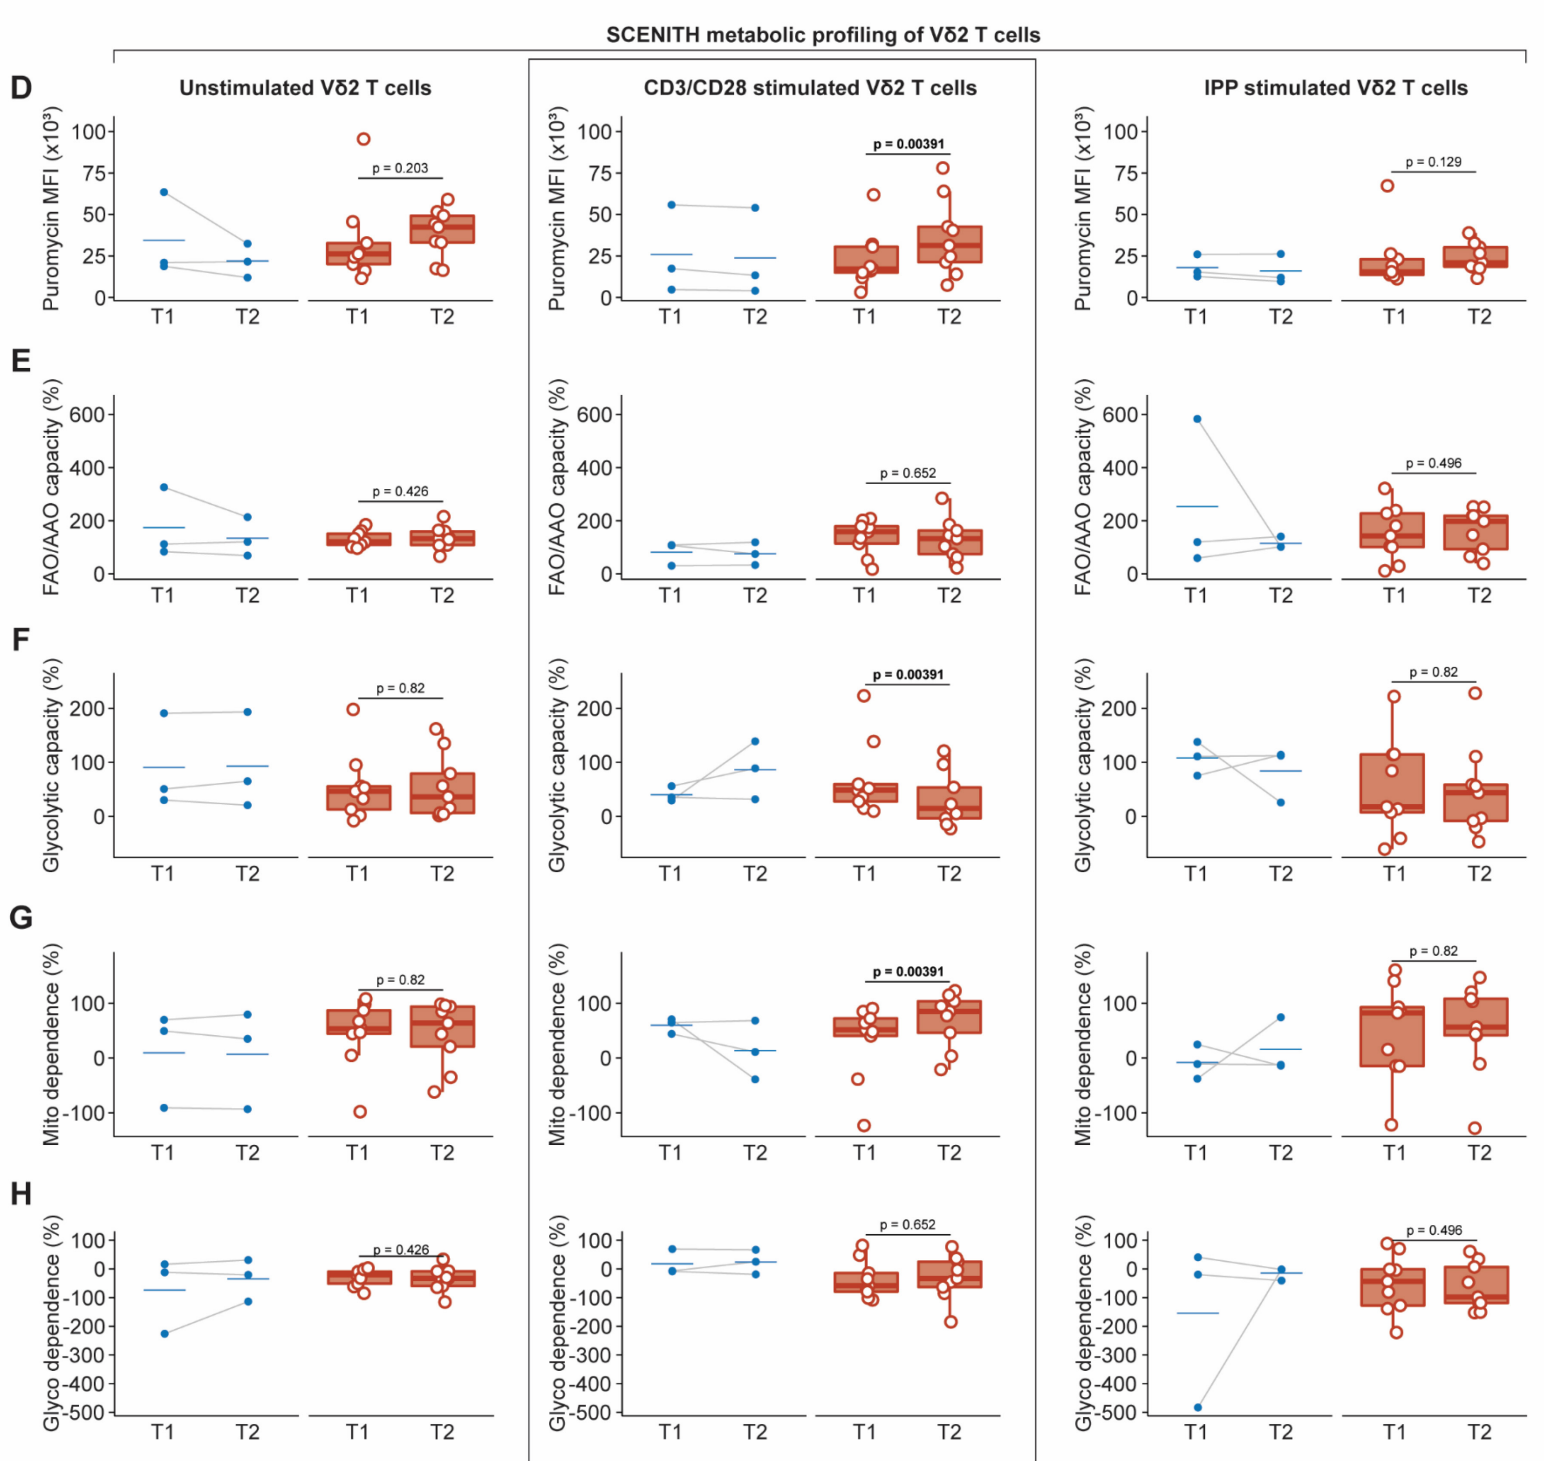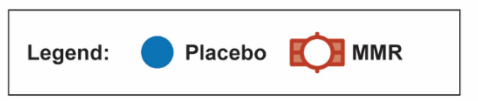

665 **Fig. 5. Functional and metabolic characterization of V $\delta$ 2 cells following MMR vaccination.** . (A) The  
percentage of V $\delta$ 2 T cells in isolated PBMCs. (B) The percentage of V $\delta$ 2 T cells that produce TNF or IFN $\gamma$   
following CD3/CD28 stimulation. (C) The percentage of V $\delta$ 2 T cells expressing markers of cytotoxic  
granule release (CD107a, left) or production (Granzyme B and perforin, middle and right). metabolic  
parameters by modified SCENITH™ (<https://www.scenith.com>) calculated as in Argüello *et al.* (23): (D)  
670 puromycin incorporation, (E) FAO/AAO capacity, (F) Glycolytic capacity, (G) Mitochondrial  
dependence, (H) Glycolysis dependence. All parameters were measured by flow cytometry.

**Supplementary materials for:**

675

**MMR vaccination induces a trained immunity program characterized by functional and metabolic reprogramming of  $\gamma\delta$  T cells**

Rutger J. Röring<sup>1,2†</sup>, Priya A. Debisarun<sup>1,2†</sup>, Javier Botey-Bataller<sup>1,2,3,4†</sup>, Tsz Kin Suen<sup>5</sup>, Özlem Bulut<sup>1,2</sup>, Gizem Kilic<sup>1,2</sup>, Valerie A. C. M. Koeken<sup>1,2,3,4</sup>, Andrei Sarlea<sup>1</sup>, Harsh Bahrar<sup>1,2</sup>, Helga Dijkstra<sup>1,2</sup>, Heidi Lemmers<sup>1,2</sup>, Katharina L. Gössling<sup>6</sup>, Nadine Röchel<sup>6</sup>, Philipp N. Ostermann<sup>7</sup>, Lisa Müller<sup>7</sup>, Heiner Schaal<sup>7</sup>, Ortwin Adams<sup>7</sup>, Arndt Borkhardt<sup>6</sup>, Yavuz Ariyurek<sup>8</sup>, Emile J. de Meijer<sup>8</sup>, Susan Kloet<sup>8</sup>, Jaap ten Oever<sup>1,2</sup>, Katarzyna Placek<sup>4</sup>, Yang Li<sup>1,2,3,4</sup>, Mihai G. Netea<sup>1,2,5\*</sup>

† These authors contributed equally to this work.

685

\*Corresponding author:

Mihai G. Netea, MD, PhD

Department of Internal Medicine, Radboud University Nijmegen Medical Center

Tel: +31-24-3618819

690 E-mail: [mihai.netea@radboudumc.nl](mailto:mihai.netea@radboudumc.nl)

**This PDF file includes:**

695 Materials and Methods  
Figs. S1 to S6  
Tables S1 to S3

**Other Supplementary Materials for this manuscript include the following:**

700 Data S1 (Olink before and after MMR)

## MATERIALS AND METHODS

### Study design

705 This randomized placebo-controlled trial, depicted in Fig. 1A, was designed to research the ability of  
MMR vaccination to establish trained immunity. Therefore, participants were 1:1 allocated to receive  
either a placebo vaccination (0.1 ml of 0.9% saline solution), or an MMR vaccination (SD, 0.5 ml, live  
attenuated mumps virus [strain 'Jeryl Lynn', at least  $12.5 \times 10^3$  CCID50]; live attenuated measles virus  
[strain 'Enders' Edmonston', at least  $1 \times 10^3$  CCID50]; live attenuated rubella virus [strain 'Wistar RA  
710 27/3', at least  $1 \times 10^3$  CCID50]). Vaccination was performed intramuscularly in the right upper arm  
and. Blood was drawn at baseline ("T1") and one month after vaccination ("T2"). The trial protocol  
registered under NL74082.091.20 in the Dutch trial registry, was approved in 2020 by the Arnhem-  
Nijmegen Ethics Committee. All experiments were conducted in accordance with the Declaration of  
Helsinki and no adverse events were recorded.

715

### Study subjects

Thirty-nine healthy volunteers (**Table S1**) within the age of 18 and 50 years, were recruited between  
June and September 2020. Subjects with a medical history associated with immunodeficiency or a solid  
or non-solid malignancy within the two preceding years were excluded. Vaccination three months prior  
720 to the start of the study or plans to receive other vaccinations during the study period was not allowed.  
Acute illness within two weeks before study initiation or the use of drugs, including non-steroidal anti-  
inflammatory drugs (NSAIDs) less than four weeks before the start of the trial, with the exception of  
oral contraceptives, also resulted in exclusion. Pregnant subjects were not eligible. All participants gave  
written informed consent.

725

### Blood collection and sample processing

EDTA whole blood (8 x 10 ml) was collected via venipuncture. Two of the EDTA tubes were centrifuged  
immediately after collection at  $2970 \times g$  for 10 minutes at room temperature (RT) and plasma was

stored at -80 °C until later analysis. Hematological parameters such as white blood cell count and  
730 differential were measured on a Sysmex XN-450 apparatus. Additionally, 1 ml of whole blood was  
stored at -80 °C for genotyping analysis.

Peripheral blood mononuclear cells (PBMCs) were isolated by density-gradient centrifugation over  
Ficoll-Paque. Briefly: EDTA blood was diluted in calcium/magnesium-free PBS and layered on Ficoll-  
Paque solution. After centrifugation for 30 minutes at 615 x g (no brakes; RT), the PBMC layer was  
735 collected and washed at least 3 times with cold calcium/magnesium-free PBS. The cells were  
resuspended in RPMI-1640 with Dutch modifications (Invitrogen) supplemented with 50 mg/ml  
gentamicin (Centrafarm), 2 mM GlutaMAX (Gibco) and 1 mM pyruvate (Gibco) and counted by Sysmex.  
For cytokine production assessments, PBMCs were seeded in round-bottom 96 well plates at  $0.5 \times 10^6$   
cells/well. The cells were stimulated for 24 hours using the stimuli described in **Table S3** (all in the  
740 presence of 10% human pooled serum, at 37 °C and 5% CO<sub>2</sub>). Supernatants were collected and stored  
at -20 °C until further analysis.

### **PBMC freezing and thawing**

Leftover PBMCs were resuspended in ice-cold, heat-inactivated fetal bovine serum (FBS) prior to  
745 cryopreservation. Ice-cold 20% DMSO in FBS was added dropwise to the cells until a final concentration  
of 10% DMSO was reached. The cells were stored for up to 24 hours in CoolCell alcohol-free freezing  
containers (Corning) at -80 °C, after which they were transferred to a -150 °C freezer for long-term  
storage.

For subsequent experiments, PBMCs were thawed following a protocol modified from Hønge et al (45).  
750 The PBMCs were retrieved from the -150 °C storage and kept on dry ice until the moment of thawing.  
The cells were rapidly warmed in a water bath of 37 °C until only a small clump of ice was present in  
the vial. The contents were immediately transferred into a 10x volume of pre-warmed thawing  
medium (RPMI supplemented as described above, further supplemented with 20% FBS and 12.5 µg/ml  
DNase-I). The cells were centrifuged at 500 x g for 10 minutes at RT and resuspended in thawing

755 medium without DNase-I. The cells were again centrifuged, resuspended in cold PBS and counted with trypan blue to assess recovery and viability.

### **ELISA cytokine measurements and data analysis**

The cytokines TNF (commonly referred to as TNF- $\alpha$ ), IL-6, IL-1Ra, and IP-10 were measured using  
760 DuoSet ELISA kits from R&D systems, and IFN $\alpha$  with a kit from PBL Assay Science, using the manufacturer's protocol. To account for plate-to-plate variation, the participants were randomized over different plates (timepoints were kept together on the same plate). Cytokine concentrations were calculated relative to the standard curve in Gen5 software (BioTek). Log<sub>2</sub>-fold changes were calculated between T2 and T1, and corrected for sex, age, and BMI using a linear regression approach. The MMR  
765 and placebo groups were compared using Mann-Whitney U tests.

### **Targeted proteomics analysis by proximity extension assay**

Plasma samples from 16 MMR-vaccinated individuals were sent to Olink (Sweden) for targeted proteomics analysis using proximity extension assay technology. In total, 1472 proteins were  
770 measured, of which 183 were removed from the analysis due to them being poorly detectable in >25% of samples (30 cardiometabolic proteins, 46 inflammatory proteins, 56 neurology proteins, 51 oncology proteins). Unadjusted p-values were calculated using the Wilcoxon signed rank test.

### **DNA isolation and genotyping**

775 Whole blood samples were shipped on dry ice to the Human Genomics Facility of the Genetic Laboratory of the Department of Internal Medicine at Erasmus MC, Rotterdam, The Netherlands. There, DNA isolation was performed and samples were genotyped using Illumina GSA Arrays "Infinium iSelect 24x1 HTS Custom Beadchip Kit".

### **780 Single cell library preparation and sequencing**

Cryopreserved PBMCs were thawed as described above and washed an additional time with ice-cold PBS. Single cell gene expression libraries were generated on the 10x Genomics Chromium platform using the Chromium Next GEM Single Cell 3' Library & Gel Bead Kit v3.1 and Chromium Next GEM Chip G Single Cell Kit (10x Genomics) according to the manufacturer's protocol. Single-cell ATAC-seq  
785 libraries were generated on the 10x Genomics Chromium platform using the Chromium Next GEM Single Cell ATAC Library & Gel Bead Kit v1.1 and Chromium Next GEM Chip H Single Cell Kit (10x Genomics) according to the manufacturer's protocol. Gene expression and ATAC-seq libraries were sequenced on a NovaSeq 6000 S4 flow cell using v1.5 chemistry (Illumina).

## 790 **Single-cell sequencing data analysis**

### *Pre-processing and demultiplexing scRNA-seq and snATAC-seq data*

The proprietary 10x Genomics Cell Ranger pipeline (v4.0.0) was used with default parameters. Cell Ranger count or Cell Ranger-atac count was used to align read data to the reference genome provided by 10x Genomics. refdata-cellranger-arc-GRCh38-2020-A-2.0.0 was used for the snATAC-seq  
795 experiments and refdata-gex-GRCh38-2020-A for the scRNA-seq. In scRNA-seq, a digital gene expression matrix was generated to record the number of UMIs for each gene in each cell. In snATAC-seq, fragment files were created.

Each library was further demultiplexed by assigning cell barcodes to their donor. SoupCell (v1.3 gb) (46) was used for genotype-free demultiplexing by calling candidate variants on the pre-mapped bam  
800 files. Cells were clustered by their allelic information and each cluster was matched to a donor with a known genotype.

### *scRNA-seq data analysis*

The expression matrix from each library was loaded to R/Seurat package (v3.2.2) (47) for downstream  
805 analysis. To control the data quality, we first excluded cells with ambiguous assignments from SoupCell demultiplex. Next, we further excluded low-quality cells with > 25% mitochondrial reads, < 100 or > 3,000 expressed genes, or > 5000 UMI counts.

After QC, we applied LogNormalization (Seurat function) and scaled the data, regressing for total UMI  
810 counts, number of features, percentage of mitochondrial genes and percentage of ribosomal genes.  
We then performed principal component analysis (PCA) based on the 2,000 more highly variable  
features identified using the vst method implemented in Seurat. As batches showed a good integration  
of the data, no integration algorithm was applied. Cells were then clustered using the Louvain  
algorithm with a resolution of 0.75 based on neighbors calculated the first 30 principal components.  
815 For visualization, we applied UMAP based on the first 30 principal components.

#### *Annotation of scRNA-seq clusters*

Clusters were annotated by manually checking the expression of known marker genes. Cluster 5  
showed a higher expression of gamma and delta chain genes (*TRGC1*, *TRDC*), along with T cell markers  
820 (*CD3E*). Performing dimensionality reduction and clustering on this subset revealed two mixed  
populations: MAIT cells overexpressing *KLRB1* and  $\gamma\delta$  T cells over expressing *TRDC/TRGC*, these cells  
were then annotated accordingly.

#### *Differential gene expression and gene-set enrichment*

825 For paired comparison between timepoints in both MMR and placebo, differential expression (DE)  
tests were performed using the FindMarkers functions in Seurat with MAST (48). Patient ids were  
regressed out, in order to perform a paired analysis. Genes with a Bonferroni-corrected P-value < 0.05  
were regarded as differentially expressed.

Gene-set enrichment was performed using the enrichGO function from the R package clusterProfiler.  
830 Gene-sets enriched with a Benjamin-Hochberg corrected p-value below 0.05 and more than 4 genes  
were considered significant.

#### *snATAC-seq data analysis*



ArchR (49) was used for the downstream analyses on snATAC-seq data, reading the fragment files  
835 created in by CellRanger-atac. Cells with fewer than 1,000 unique fragments, a transcription start site  
enrichment below 4, identified as doublets by ArchR, or ambiguously labelled by souporecell were  
removed.

After QC, we used the ArchR function 'addIterativeLSI' to process iterative latent semantic indexing  
using the top 25,000 variable features and top 30 dimensions. For visualization, we applied UMAP with  
840 nNeighbors = 30 and minDist = 0.5.

Gene scores were calculated for each cell based on accessibility. In order to aid the analysis of gamma-  
delta T cells, a modified reference was used. Adding the gtf gene reference used by CellRanger, gene  
scores could be calculated for *TRDC*, *TRGC1* and *TRGC2*.

#### 845 *snATAC-seq annotation and integration with scRNA-seq data*

ArchR function 'addGeneIntegrationMatrix' was used to compare the calculated snATAC-seq gene  
score matrix and the measured gene expression in scRNA-seq data. This resulted in a matched scRNA  
profile and predicted cell type per sequenced cell in the snATAC-seq data. Cell types were therefore  
assigned to the snATAC-seq data based on the predicted cell type of the integration. UMAPs of the  
850 integrated blocks were inspected in order to examine the quality of the integration (**Fig. S2A-B**).

#### *Per cell type analysis of snATAC-seq data*

A common approach was followed to inspect the open-chromatin changes in each cell type. The same  
method as described before for the whole cell pool was used for visualization and clustering separately  
855 in each cell type. After, open-chromatin peaks were calculated by running 'addReproduciblePeakSet'  
using Macs2 algorithm (50). Transcription factor motif deviations were calculated based on the 'CIS-  
BP' database annotation (51) using the 'addDeviationsMatrix' function. The effects of MMR  
vaccination and placebo were assessed by running 'getMarkerFeatures' comparing both timepoints

for all data types: open-chromatin peaks, TF motifs and gene score. FDR < 0.05 was indicative of  
860 significant changes.

#### **Flow cytometry measurements of $\gamma\delta$ T cell parameters**

The flow cytometry staining was performed as follows:  $5 \times 10^5$  thawed PBMCs were stained for surface  
markers using the antibodies described in **Table S3**, for 30 minutes in the dark at 4 °C, in FACS buffer  
865 (PBS, 5% FBS, 2 mM EDTA Intracellular proteins were analyzed after fixation and permeabilisation in  
Cytofix permeabilization/fixation reagent (BD biosciences) for 30 mins. Following two washes with  
Cytofix permeabilization/washing buffer (BD biosciences), the cells were stained with the antibodies  
against intracellular markers detailed in **Table S3**, for 30 minutes in the dark at 4 °C. After completion  
of the staining procedure, the cells were washed with PBS and stored in CellFIX reagent (BD  
870 biosciences) until acquisition on a LSR II cytometer (BD biosciences).

The flow cytometry data was analyzed in FlowJo (vX.07). The gating strategy was as follows: events  
corresponding to lymphocyte size were selected based on FSC-A/SSC-A, followed by selection of single-  
cell events in subsequent FSC-H/FSC-A and FSC-W/FSC-A gates. Viable cells were selected by gating on  
875 viability-dye-negative cells. The analyses were performed on  $CD45^+CD3^+V\delta 2^+$  cells.

For measurement of surface markers on unstimulated  $V\delta 2$  T cells, the thawed PBMC were stained as  
described above immediately after thawing. For measurements of cytokine expression or surface  
markers after stimulation, the PBMCs were first treated with soluble anti-CD3/anti-C28 (BD bioscience)  
880 for 4 hours in the presence of a Golgi plug (Brefeldin A; BD bioscience), under standard cell culture  
conditions.

#### **SCENITH**

We modified the original SCENITH<sup>TM</sup> technique (<https://www.scenith.com>) to analyze energy  
885 metabolism of  $\gamma\delta$  T cells. Briefly, PBMCs were plated at  $0.3 \times 10^6$  cells/well in 96-well plates. The cells

were cultured in RPMI alone or stimulated with soluble anti-CD3/anti-CD28, or IPP for 4 hours under standard cell culture conditions. Cells were then untreated (control) or treated with 2-DG (final concentration 100 mM), Oligomycin (O, final concentration 10  $\mu$ M) and combination of 2-DG and Oligomycin (DGO, final concentration 100 mM and 10  $\mu$ M) for 30 min under standard cell culture  
890 conditions. Following addition of puromycin (final concentration 10  $\mu$ g/ml), the cells were incubated for an additional 45 minutes. The cells were subsequently harvested and washed in cold FACS buffer before being stained as described above.

### **Statistical analysis and software**

895 All data was analyzed in R as described in each relevant section of the methods. Unless otherwise indicated, two-tailed p-values of  $<0.05$  were considered statistically significant. If correction for multiple testing was applied, the method is described in the relevant methods section. In cases where the p-value is not provided, an asterisk (\*) indicates statistical significance.

The following R packages were used for the present work: the Tidyverse core packages 1.3.2 (52),  
900 Seurat 4.1.1, ArchR 1.0.2, SeuratObject 4.1.0, GenomicRanges 1.48.0, data.table 1.14.2, ggplot2 3.3.6, colortools 0.1.6, clusterProfiler 4.4.4, magrittr 2.0.3, ggprism 1.0.3, ggsci 2.9, rstatix 0.7.0, pzfx 0.3.0, janitor 2.1.0, readr 2.1.3, openxlsx 4.2.5, psych 2.2.9. The figures were compiled in Adobe Illustrator.

905 **Supplementary figures**

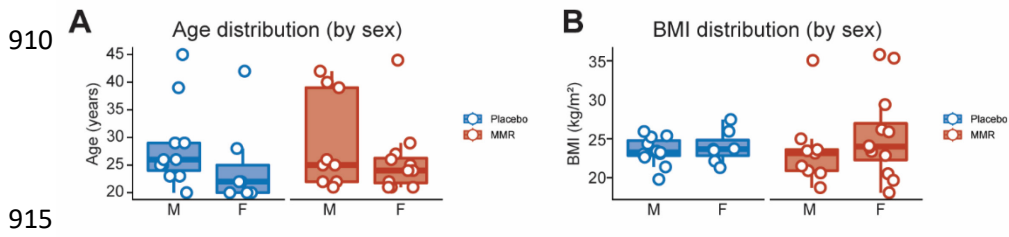

920 **Figure S1: Participant characteristics. (A)** Participant age, stratified by sex and treatment group. **(B)** Participant BMI, stratified by sex and treatment group.

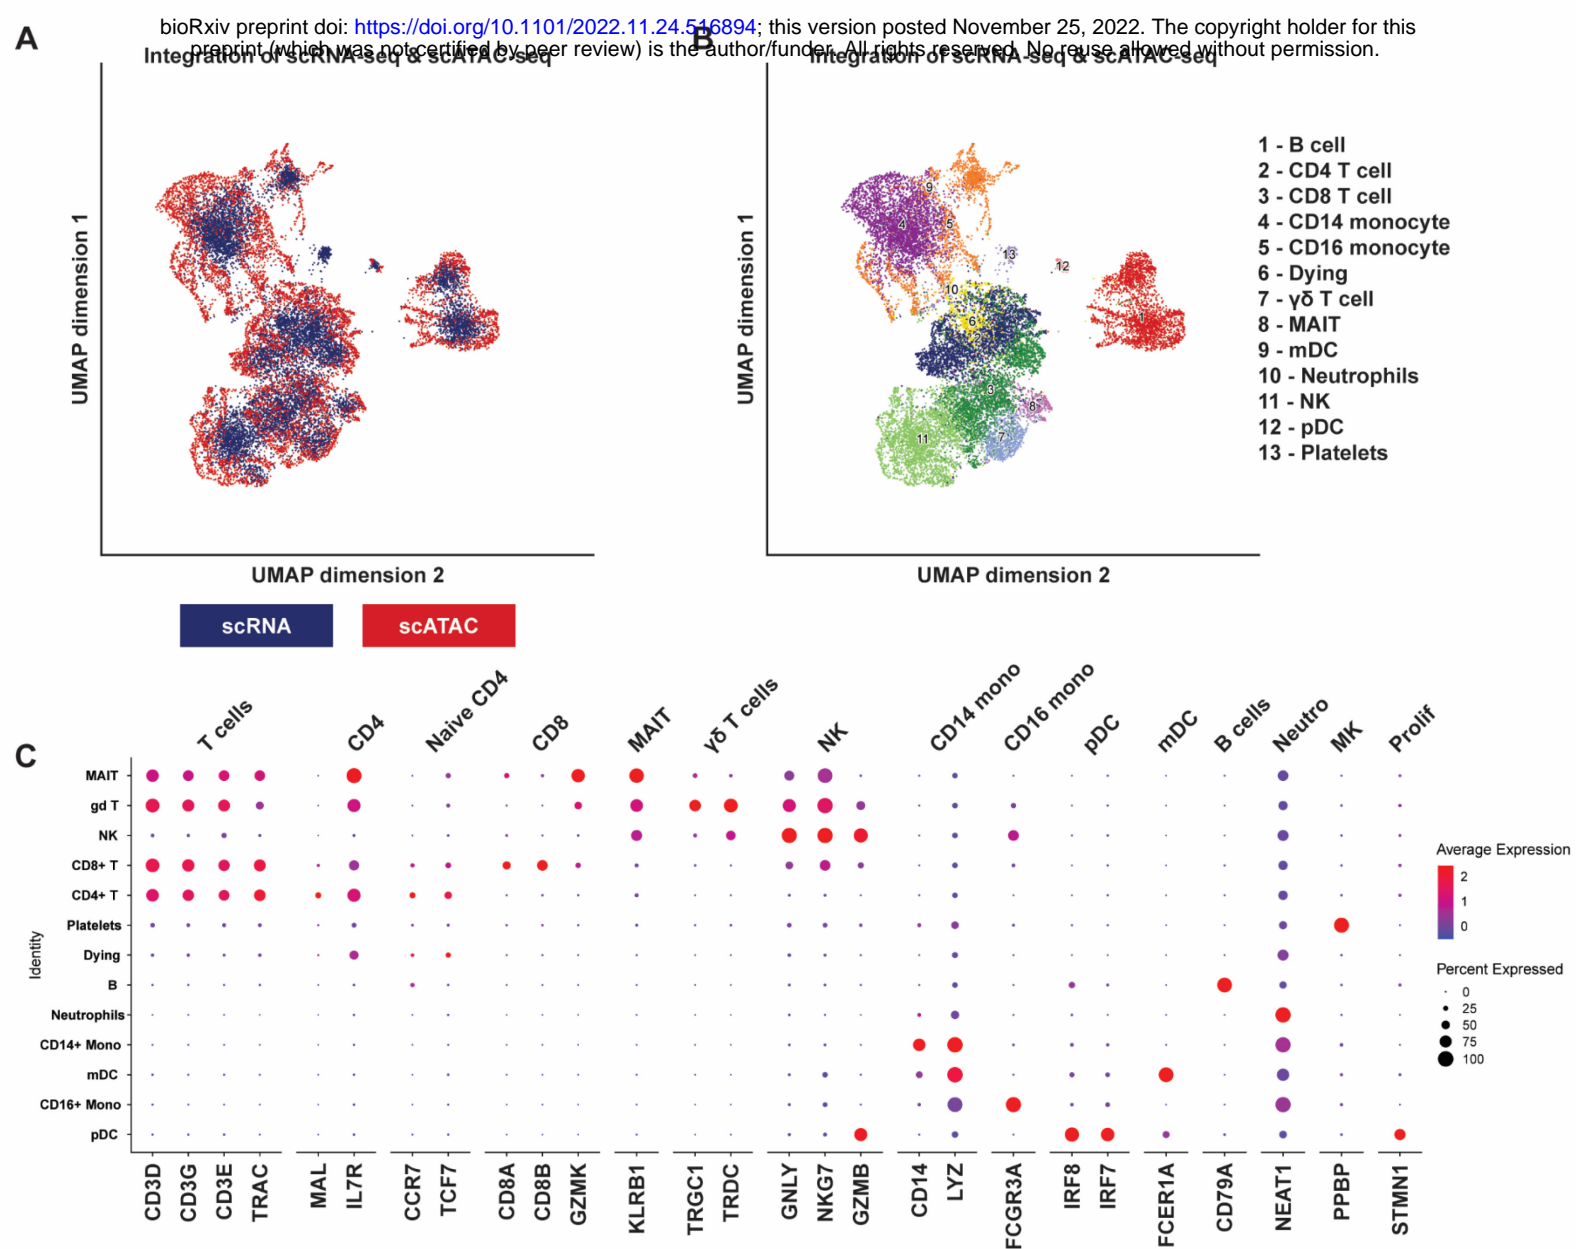

955

**Figure S2: Integration of scRNA and scATAC-sequencing data and cell-type annotation.** (A) UMAP of scRNA-seq and scATACseq integrated data. Integration was performed using canonical correlation analysis between gene expression values and gene score values calculated based on gene accessibility. (B) Same as before, colored by the different celltypes present. (C) Dotplot of markers used for celltype annotation.

960

**A**

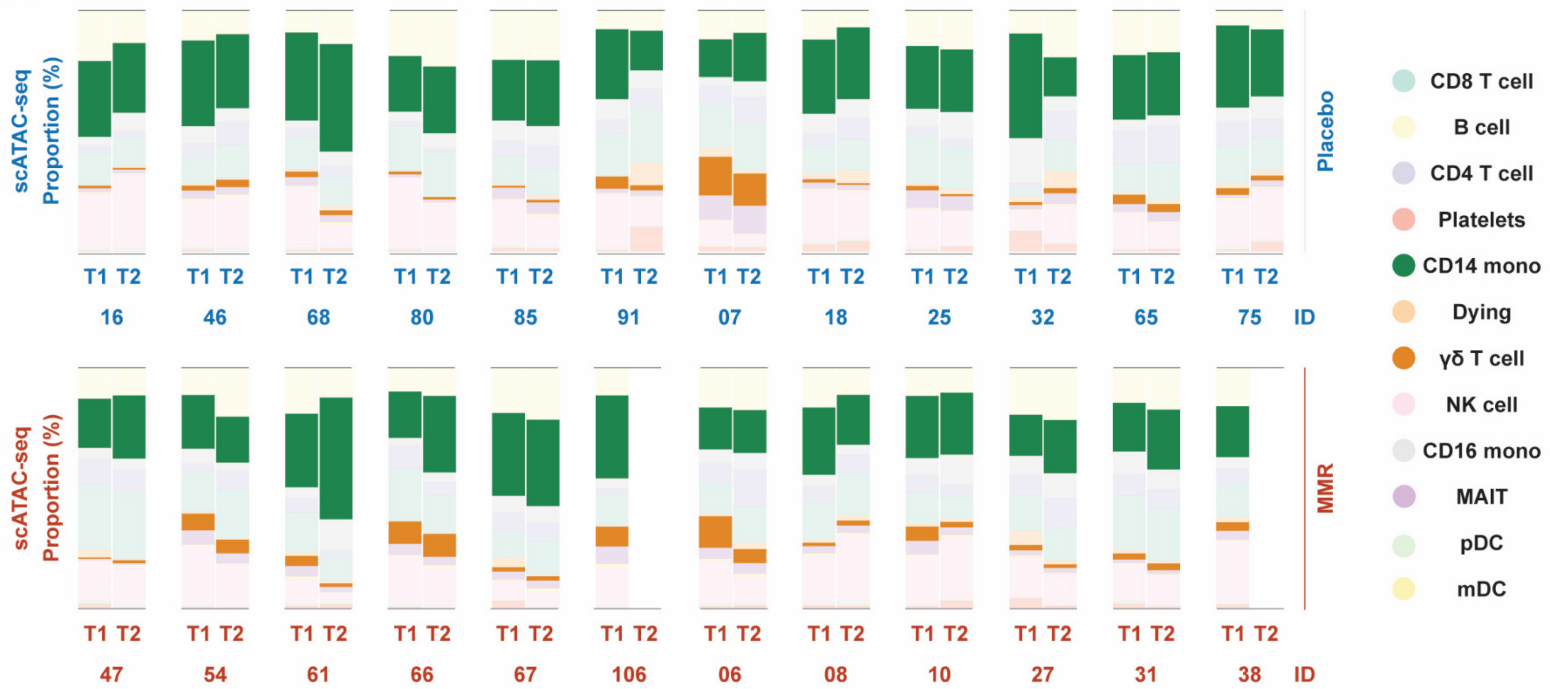

**B**

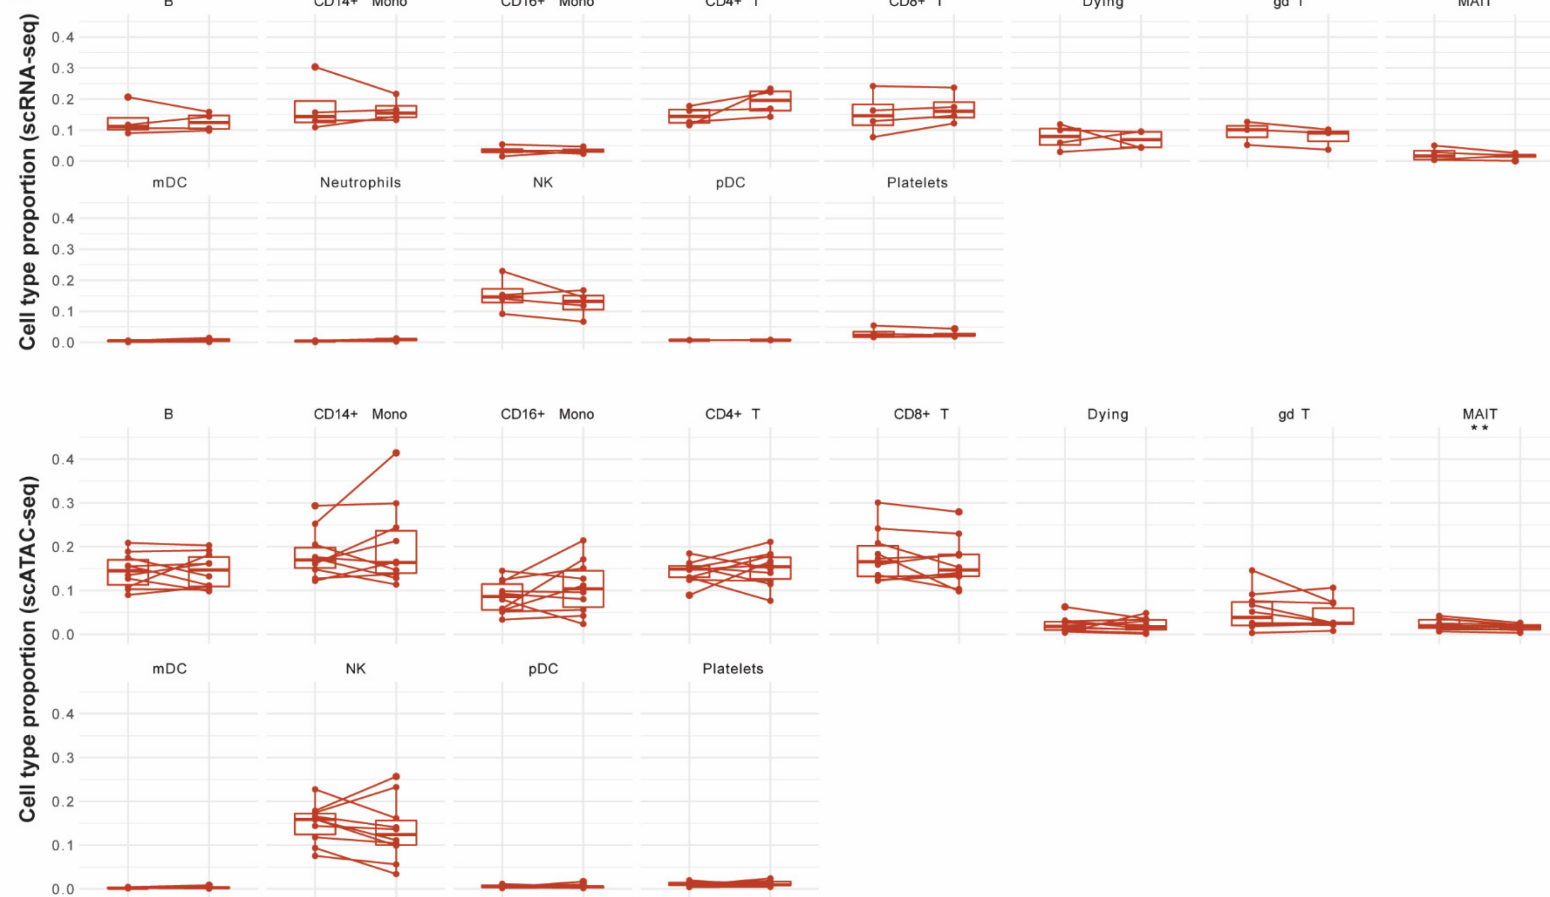

1010 **Figure S3: Cell-type proportions before and after treatment.** (A) Proportions of cell types annotated according to the scATAC-seq data in placebo and MMR samples. (B) The same data, only displayed as boxplots per cell type to enable paired comparisons.

**A**

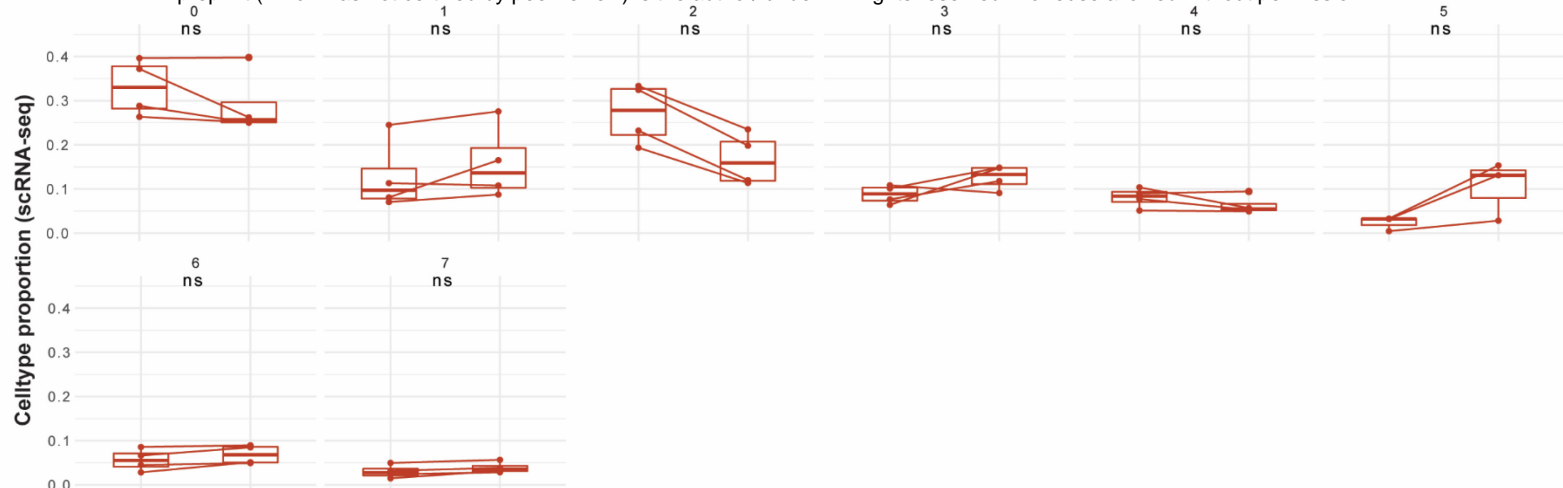

**B**

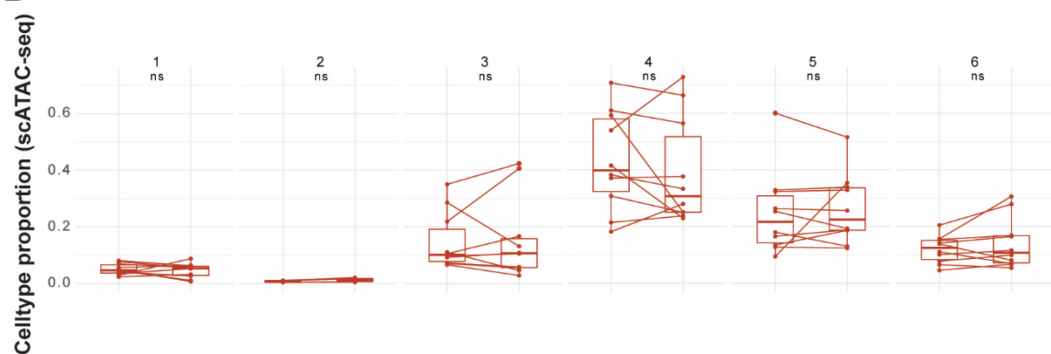

**C**

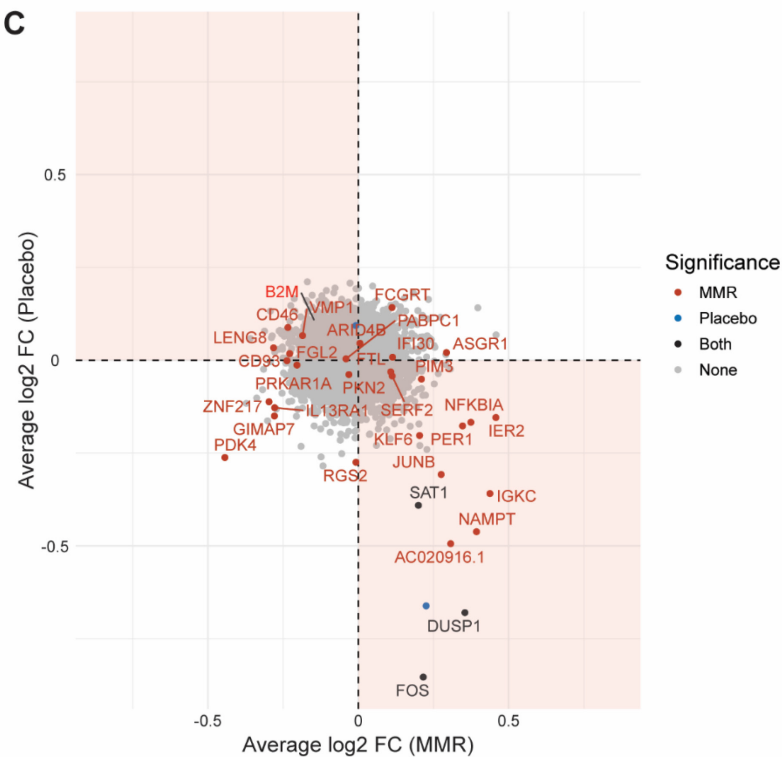

**D**

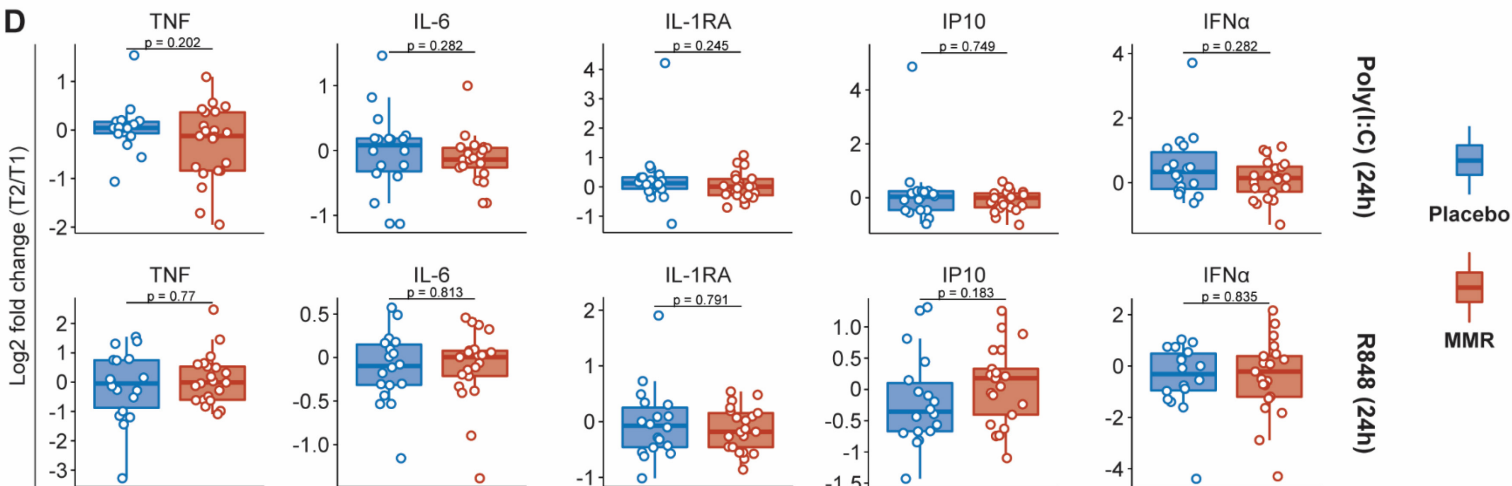

1015 **Figure S4: Single-cell analysis of monocyte subpopulations and monocyte-associated cytokine**  
**production by PBMCs. (A)** Proportions of monocyte sub-populations (scRNA-seq) before and after  
MMR vaccination. **(B)** Proportions of monocyte sub-populations (scATAC-seq) before and after MMR  
vaccination. **(C)** Combined 'volcano plot' showing average log<sub>2</sub> fold changes of monocyte gene  
expression between timepoints for both placebo and MMR. Bonferroni adjusted p-value < 0.05,  
1020 paired test using MAST. **(D)** Monocyte-associated cytokines produced by PBMCs following diverse  
stimulations; the data are expressed as log<sub>2</sub> fold-changes between baseline and one month after  
treatment.



**A**

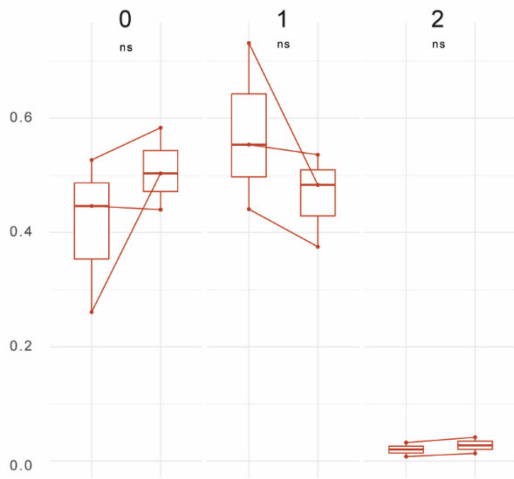

**B**

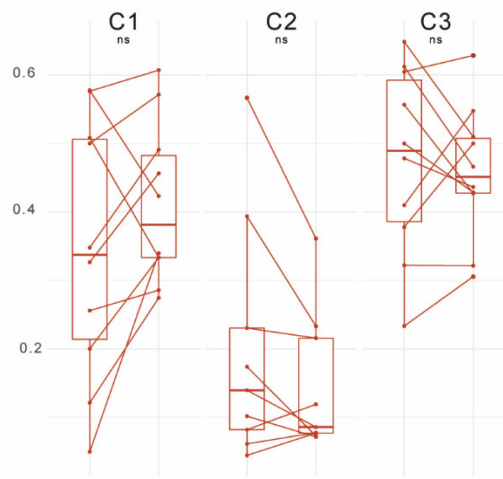

**C**

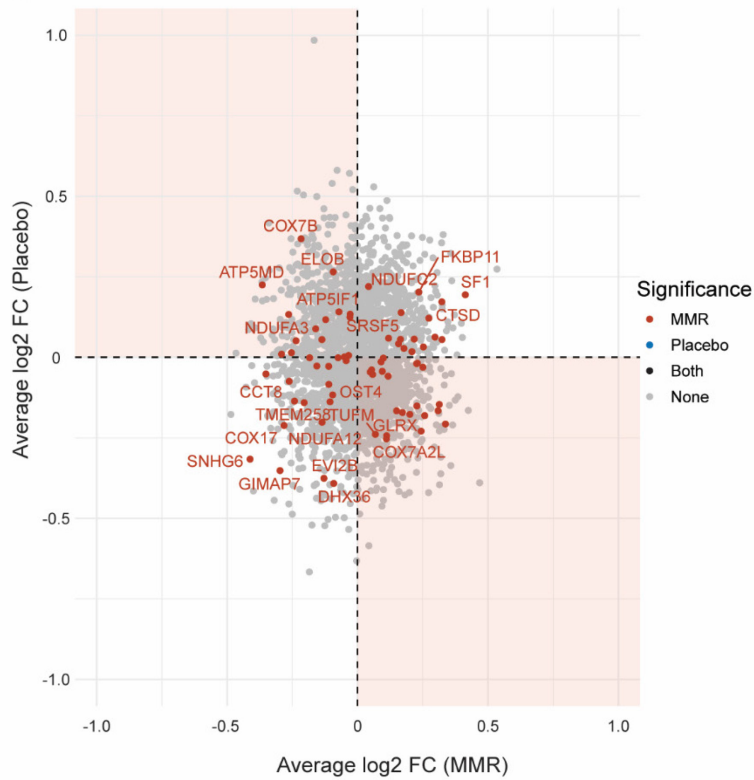

1060 **Figure S5: Single-cell analysis of  $\gamma\delta$  T cell populations. (A)** Proportions of  $\gamma\delta$  T cell sub-populations (scRNA-seq) before and after MMR vaccination. **(B)** Proportions of  $\gamma\delta$  T cell sub-populations (scATAC-seq) before and after MMR vaccination. **(C)** Combined 'volcano plot' showing average log<sub>2</sub> fold changes of  $\gamma\delta$  T cell gene expression between timepoints for both placebo and MMR. Bonferroni adjusted p-value < 0.05, paired test using MAST.

1065

Memory compartments - unstimulated V $\delta$ 2 T cells

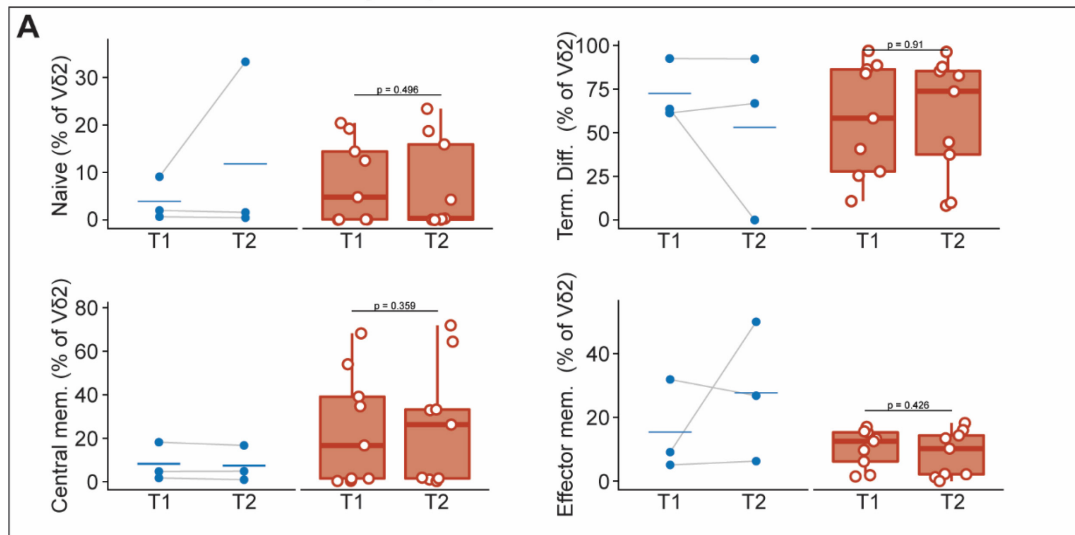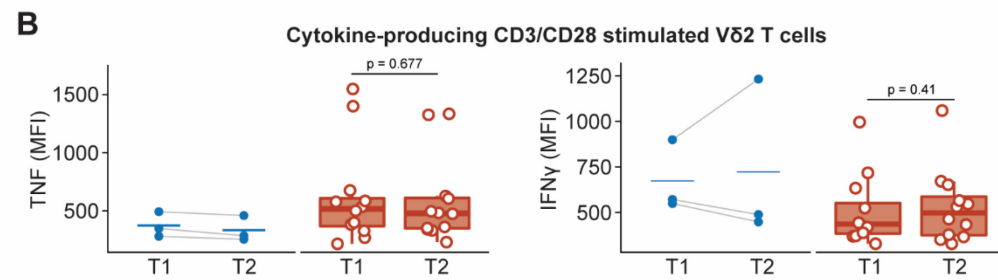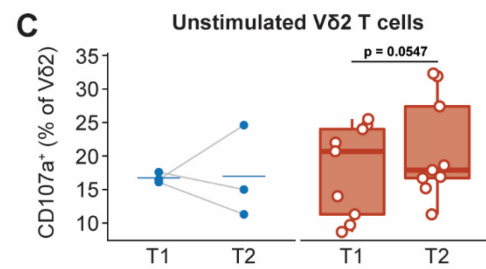

T cell dysfunction/exhaustion markers - unstimulated V $\delta$ 2 T cells

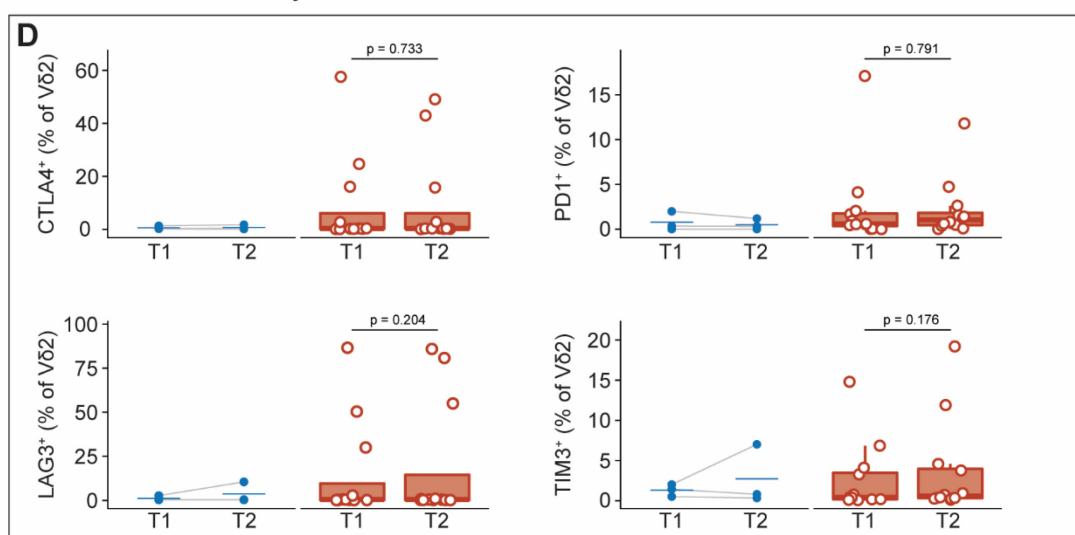

**Figure S6: characterization of V $\delta$ 2 cells following MMR vaccination. (A)** Proportions of memory compartments characterized by expression of CD27 and CD45RA. **(B)** Mean fluorescence intensities (MFI) of TNF and IFN $\gamma$  in stimulated V $\delta$ 2 T cells. **(C)** Percentage of unstimulated V $\delta$ 2 T cells that stain positive for CD107a, a marker of cytotoxic degranulation. **(D)** Proportions of V $\delta$ 2 T cells that stain positive for markers commonly associated with T cell dysfunction (CTLA4, PD1, TIM3, LAG3).

1120

**Supplementary tables**

| Characteristic *       | Placebo<br>n = 18 | MMR<br>n = 21 | p-value <sup>†</sup> |
|------------------------|-------------------|---------------|----------------------|
| Sex, female            | 7 (38.89)         | 12 (57.14)    | 0.3406               |
| Sex, male              | 11 (61.11)        | 9 (42.86)     |                      |
| Age, years             | 25 ± 7.63         | 25 ± 7.38     | 0.876                |
| BMI, kg/m <sup>2</sup> | 23.47 ± 1.89      | 23.45 ± 5.22  | 0.945                |

\* Median +/- SD for continuous variables and n (%) for categorical variables  
<sup>†</sup> Mann-Whitney U test for continuous variables and Fisher's exact test for categorical variables

1125

**Table S1: characteristics of the study population.**

| Stimulus                                                                                   | Concentration in experiment | Cat. No.  | Manufacturer                                                     |
|--------------------------------------------------------------------------------------------|-----------------------------|-----------|------------------------------------------------------------------|
| <i>E. coli</i> LPS serotype O55:B5, further purified as in (53)                            | 10 ng/ml                    | -         | Prepared in-house by Heidi Lemmers, Radboudumc                   |
| Heat-killed <i>S. aureus</i> ATCC 25923                                                    | 1 * 10 <sup>6</sup> CFU/ml  | -         | Cultured and heat-killed in-house by Jelle Gerretsen, Radboudumc |
| Heat-killed <i>C. albicans</i> yeast, UC820 (ATCC MYA-3573), prepared as described in (54) | 1 * 10 <sup>6</sup> CFU/ml  | -         | Prepared in-house by Diletta Rosati, Radboudumc                  |
| Poly(I:C)                                                                                  | 10 µg/ml                    | tlrl-pic  | Invivogen                                                        |
| R848                                                                                       | 3 µg/ml                     | tlrl-r848 | Invivogen                                                        |
| Influenza A H1N1, prepared according to the methods in (55)                                | 3.3 * 10 <sup>5</sup> /ml   | -         | Kindly prepared by KLG, NR, PNO, LM, HS, OA, AB                  |
| SARS-CoV-2, prepared according to the methods in (55)                                      | 1.4 * 10 <sup>3</sup> /ml   | -         |                                                                  |

**Table S2: Stimuli used to assess PBMC cytokine production capacity.**

1130

| Target     | Fluorophore                            | Clone    | Cat. No.    | Manufacturer  | Panel |
|------------|----------------------------------------|----------|-------------|---------------|-------|
| Viability  | Live-or-Dye Fixable Viability Stain    | -        | 32006       | Biotium       | 1     |
| CD3        | Pacific blue                           | UCHT1    | 300431      | Biolegend     | 1     |
| CD4        | PE-Cy7                                 | OKT4     | 317414      | Biolegend     | 1     |
| CD8        | APC-Cy7                                | SK1      | 344746      | Biolegend     | 1     |
| CD45       | BV605                                  | HI30     | 304042      | Biolegend     | 1     |
| Vδ2 TCR    | FITC                                   | REA771   | 130-111-009 | Miltenyi      | 1     |
| Vδ1 TCR    | PE                                     | REA173   | 130-120-440 | Miltenyi      | 1     |
| TNF        | APC                                    | MAB11    | 502912      | Biolegend     | 1     |
| IFNγ       | PerCP-Cy5.5                            | B27      | 560704      | BD Pharmingen | 1     |
| Target     | Fluorophore                            | Clone    | Cat. No.    | Manufacturer  | Panel |
| Viability  | Live/dead Fixable Aqua dead cell stain | -        | L34957      | Invitrogen    | 2     |
| CD3        | Pacific blue                           | UCHT1    | 300431      | Biolegend     | 2     |
| Vδ2 TCR    | FITC                                   | REA771   | 130-111-009 | Miltenyi      | 2     |
| Vδ1 TCR    | PE                                     | REA173   | 130-120-440 | Miltenyi      | 2     |
| CD4        | BV605                                  | OKT4     | 317438      | Biolegend     | 2     |
| CD8        | APC-Cy7                                | SK1      | 344746      | Biolegend     | 2     |
| PD1        | PerCP-Cy5.5                            | A17188 B | 621613      | BD Bioscience | 2     |
| Perforin   | Pe-Cy7                                 | dG9      | 308126      | Biolegend     | 2     |
| Granzyme B | AF647                                  | GB11     | 515406      | Biolegend     | 2     |
| CD45       | PE/Dazzle594                           | HI30     | 304052      | Biolegend     | 2     |
| Target     | Fluorophore                            | Clone    | Cat. No.    | Manufacturer  | Panel |
| Viability  | Live/dead Fixable Aqua dead cell stain | -        | L34957      | Invitrogen    | 3     |
| CD3        | APC                                    | UCHT1    | 300458      | Biolegend     | 3     |
| CD4        | PE-Cy7                                 | OKT4     | 317414      | Biolegend     | 3     |
| CD8        | APC-Cy7                                | SK1      | 344746      | Biolegend     | 3     |
| Vδ1 TCR    | Pacific blue                           | REA173   | 130-100-555 | Miltenyi      | 3     |
| Vδ2 TCR    | FITC                                   | REA771   | 130-111-009 | Miltenyi      | 3     |
| CD107a     | PE                                     | H4A3     | 328607      | Biolegend     | 3     |
| CTLA4      | BV605                                  | BNI3     | 369610      | Biolegend     | 3     |
| Lag3       | PE/Dazzle594                           | 11C3C65  | 369331      | Biolegend     | 3     |
| Target     | Fluorophore                            | Clone    | Cat. No.    | Manufacturer  | Panel |
| Viability  | Live/dead Fixable Aqua dead cell stain | -        | L34957      | Invitrogen    | 4     |
| CD45       | PE/Dazzle594                           | HI30     | 304052      | Biolegend     | 4     |
| CD45RA     | APC                                    | HI100    | 304111      | Biolegend     | 4     |
| CD3        | Pacific blue                           | UCHT1    | 300458      | Biolegend     | 4     |
| CD4        | PE-Cy7                                 | OKT4     | 317414      | Biolegend     | 4     |
| CD8        | APC-Cy7                                | SK1      | 344746      | Biolegend     | 4     |
| Vδ1 TCR    | PE                                     | REA173   | 130-120-440 | Miltenyi      | 4     |
| Vδ2 TCR    | FITC                                   | REA771   | 130-111-009 | Miltenyi      | 4     |
| CD27       | PerCP-Cy5.5                            | M-T271   | 560612      | BD Bioscience | 4     |
| NKG2D      | BV605                                  | 1D11     | 320832      | Biolegend     | 4     |

| Target           | Fluorophore                         | Clone  | Cat. No.    | Manufacturer | Panel |
|------------------|-------------------------------------|--------|-------------|--------------|-------|
| Viability        | Live-or-Dye Fixable Viability Stain | -      | 32006       | Biotium      | 5     |
| CD3              | Pacific blue                        | UCHT1  | 300431      | Biolegend    | 5     |
| CD4              | PE-Cy7                              | OKT4   | 317414      | Biolegend    | 5     |
| CD8              | APC-Cy7                             | SK1    | 344746      | Biolegend    | 5     |
| CD45             | BV605                               | HI30   | 304042      | Biolegend    | 5     |
| V $\delta$ 2 TCR | APC                                 | REA771 | 130-111-009 | Miltenyi     | 5     |
| V $\delta$ 1 TCR | PE                                  | REA173 | 130-120-440 | Miltenyi     | 5     |
| Puromycin        | AF488                               | 12D10  | MABE343     | Merck        | 5     |

**Table S3: Antibodies used in the flow cytometric analyses of V $\delta$ 2 T cells.**
